# Supplementary material for: Motif discovery in promoters of genes co-localized and co-expressed during myeloid cells differentiation
Source: PubMed Central journal article supplement — Nucleic Acids Res. 2008 Dec 5;37(2):533–49. doi: 10.1093/nar/gkn948 (PMC2632922; doi:10.1093/nar/gkn948), 2008-12-05

Position chr 1: 11768373–21375927

Number of genes 57

Median correlation 0.17

Third quartile correlations 0.54

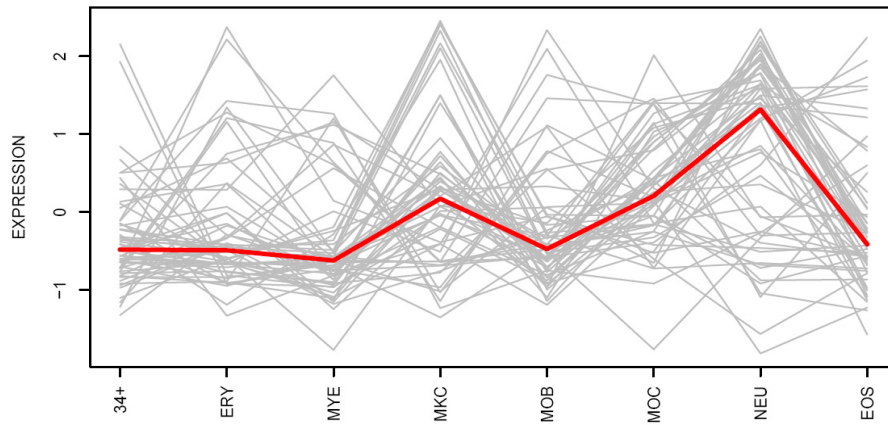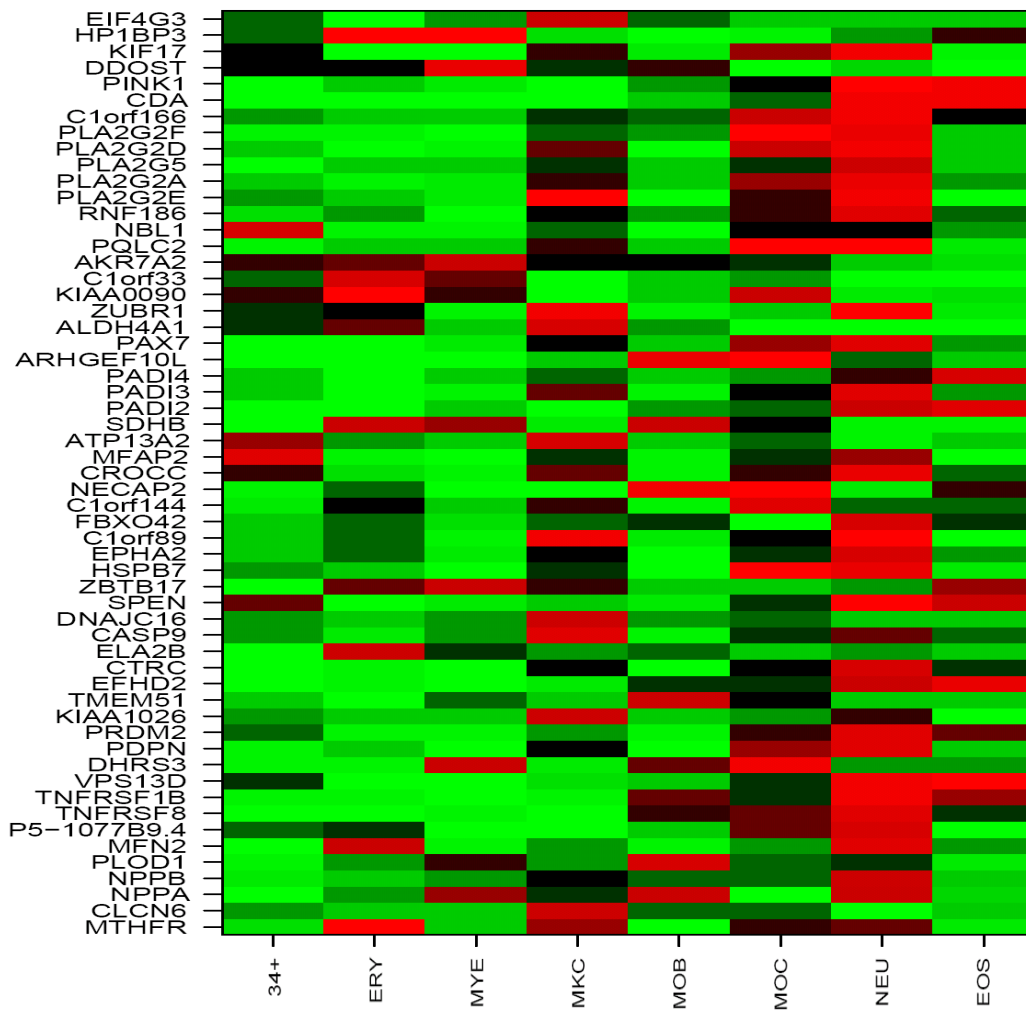

Position chr 1: 20064910–211513430

Number of genes 81

Median correlation 0.1

Third quartile correlations 0.5

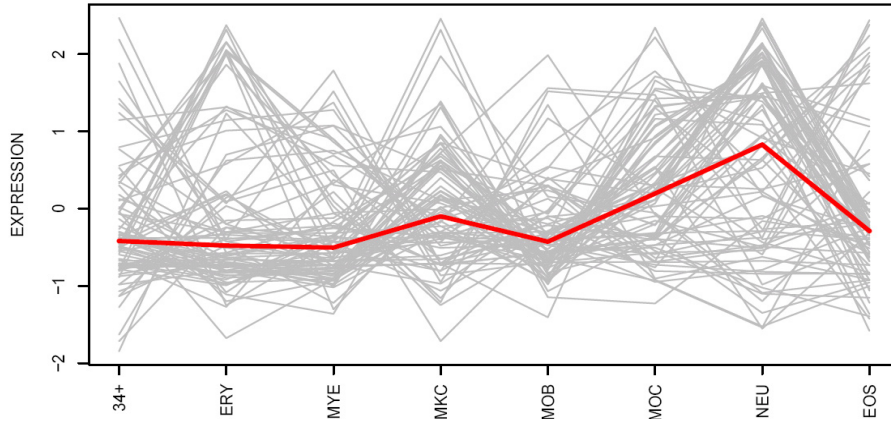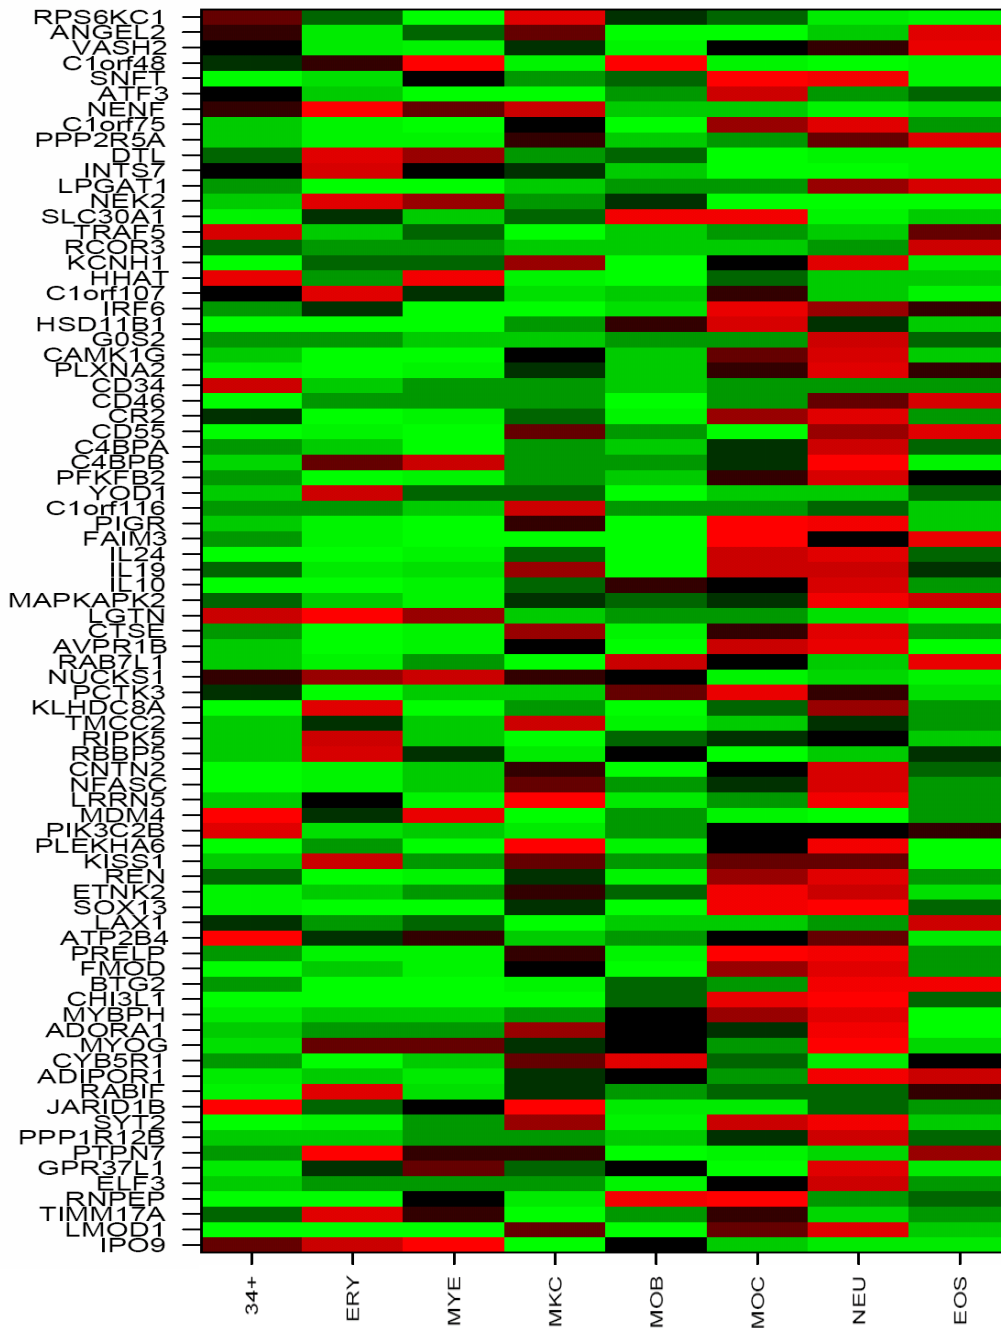

Position chr 3: 166179379–170346787

Number of genes 8

Median correlation 0.19

Third quartile correlations 0.5

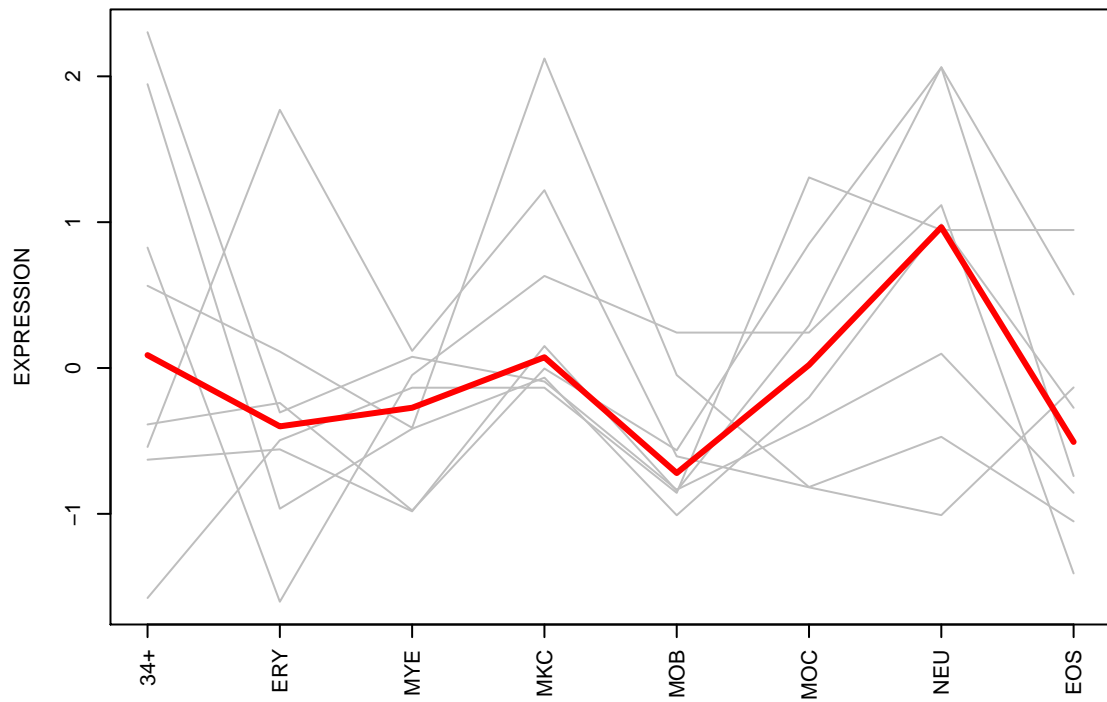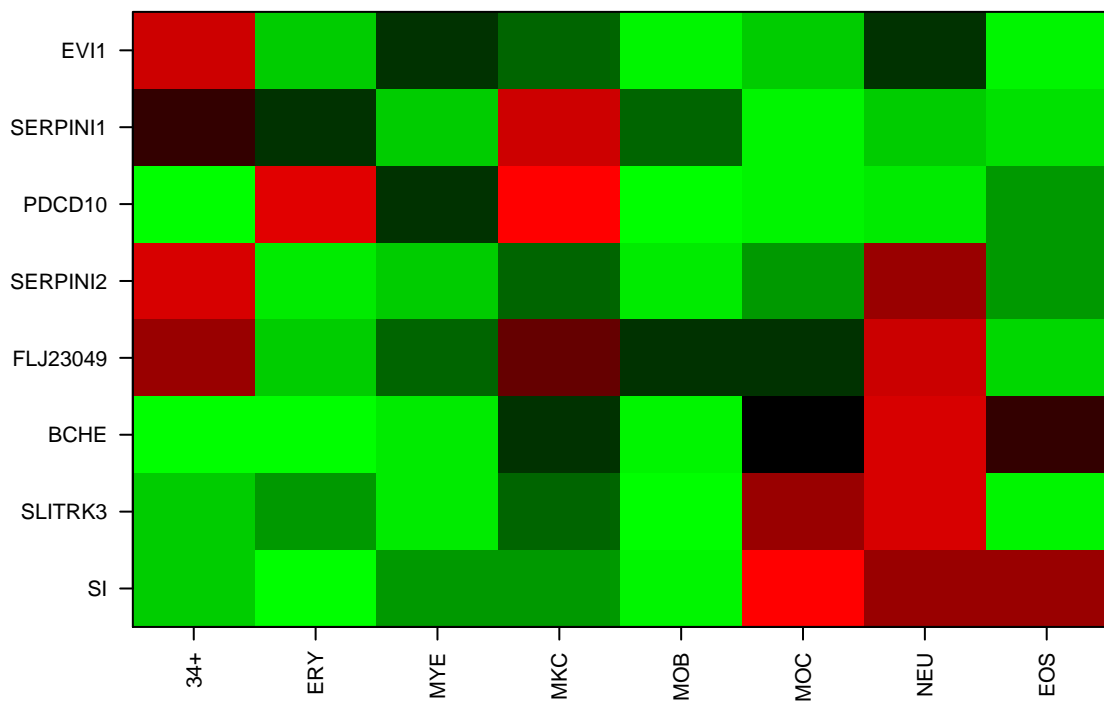



Position chr 4: 93444830–96981647

Number of genes 6

Median correlation 0.43

Third quartile correlations 0.63

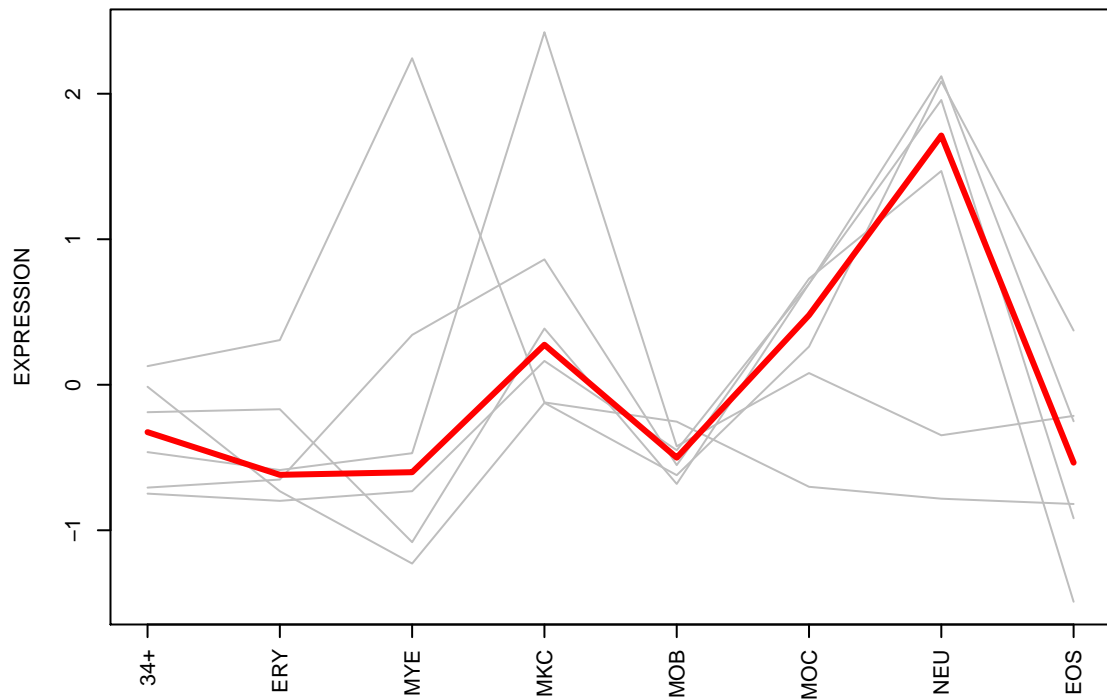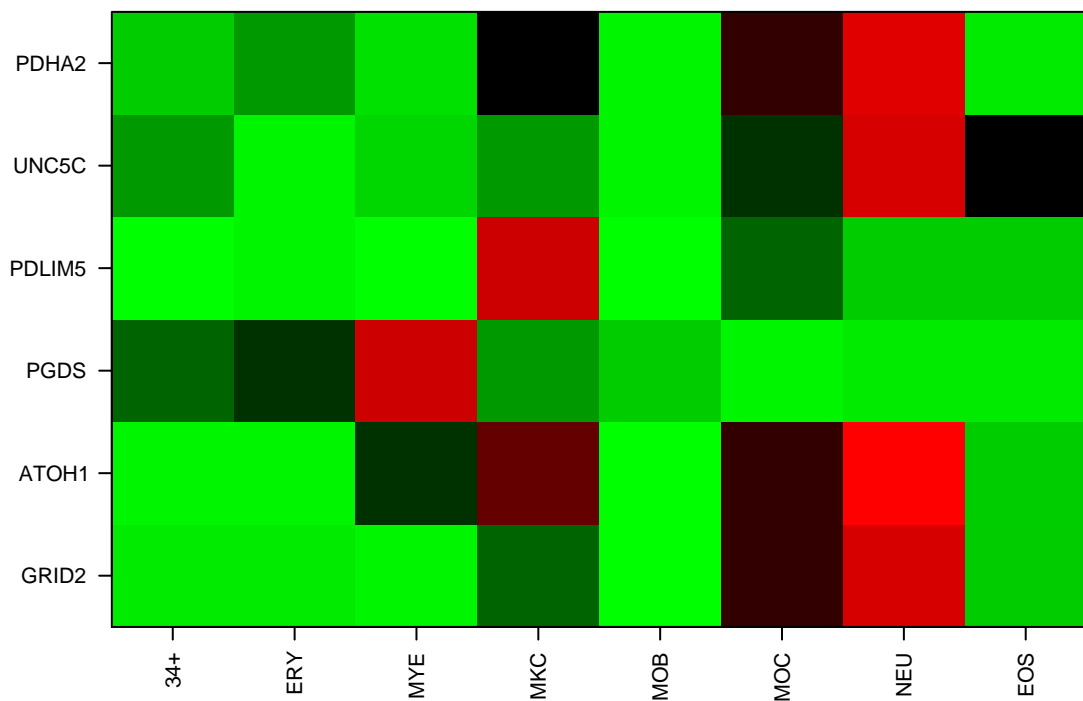

Position chr 5: 14196828–27074446

Number of genes 9

Median correlation 0.17

Third quartile correlations 0.55

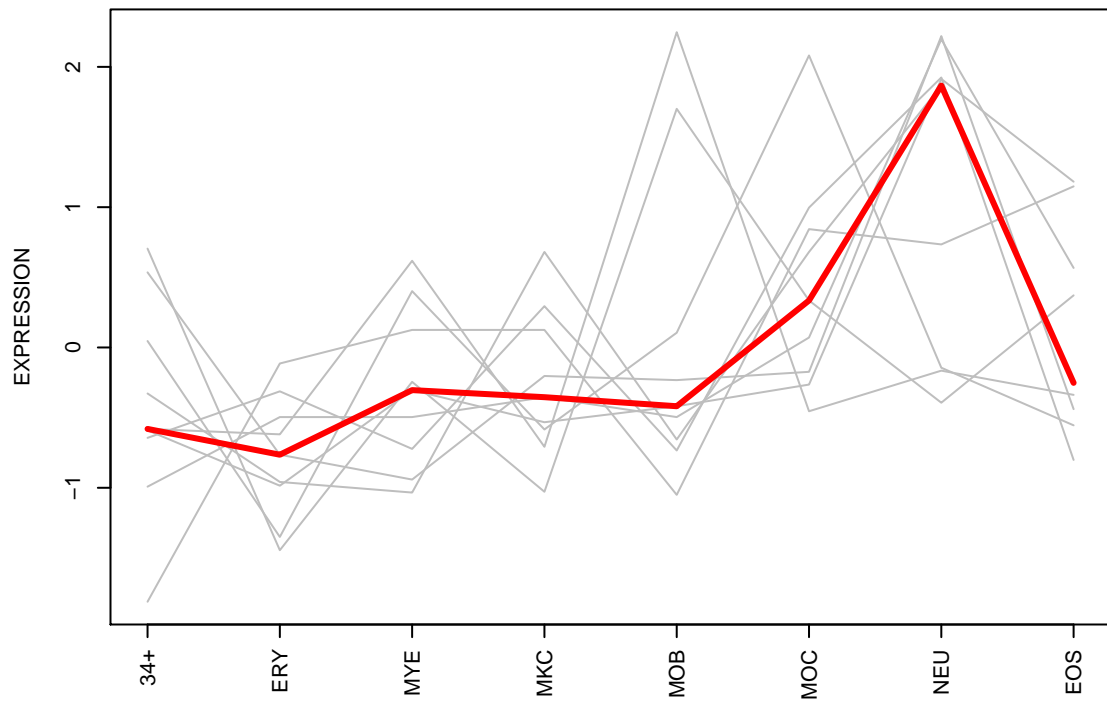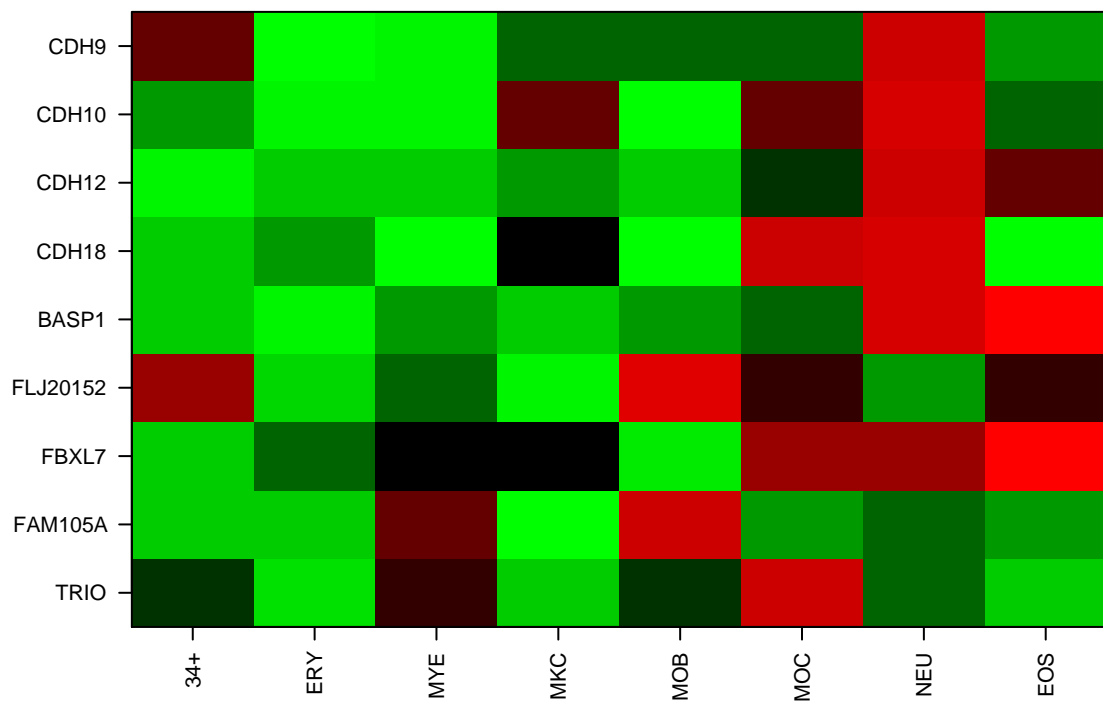

Position chr 5: 43157398–44851371

Number of genes 5

Median correlation 0.67

Third quartile correlations 0.82

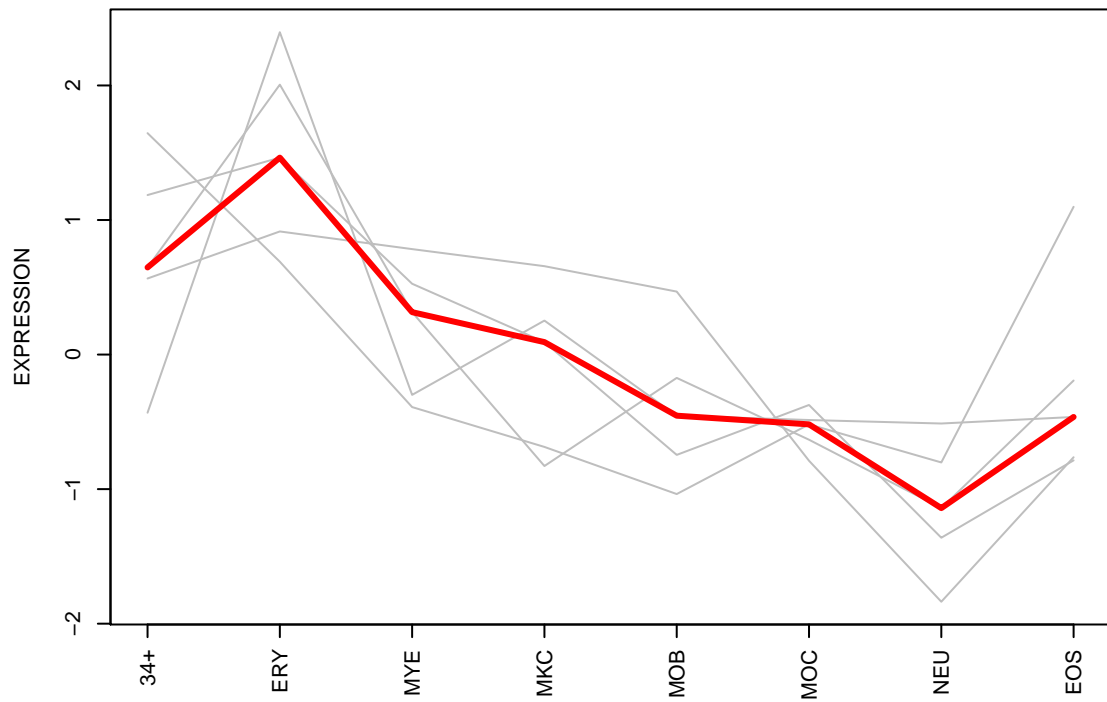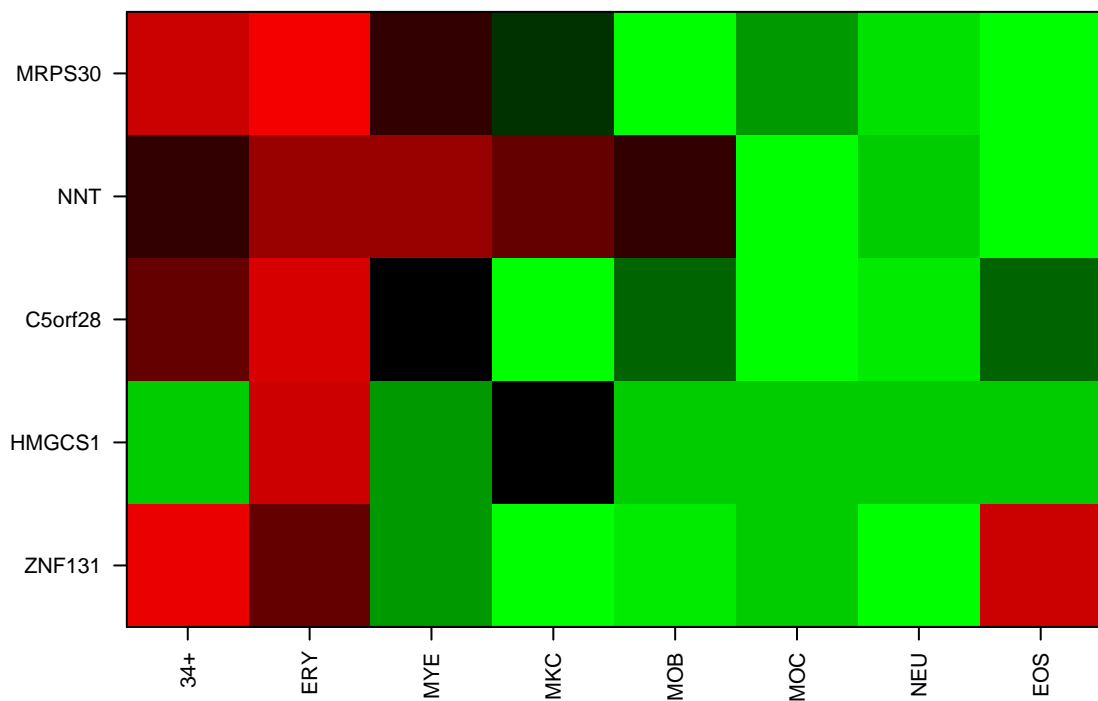

Position chr 5: 71551111–72897254

Number of genes 5

Median correlation 0.37

Third quartile correlations 0.57

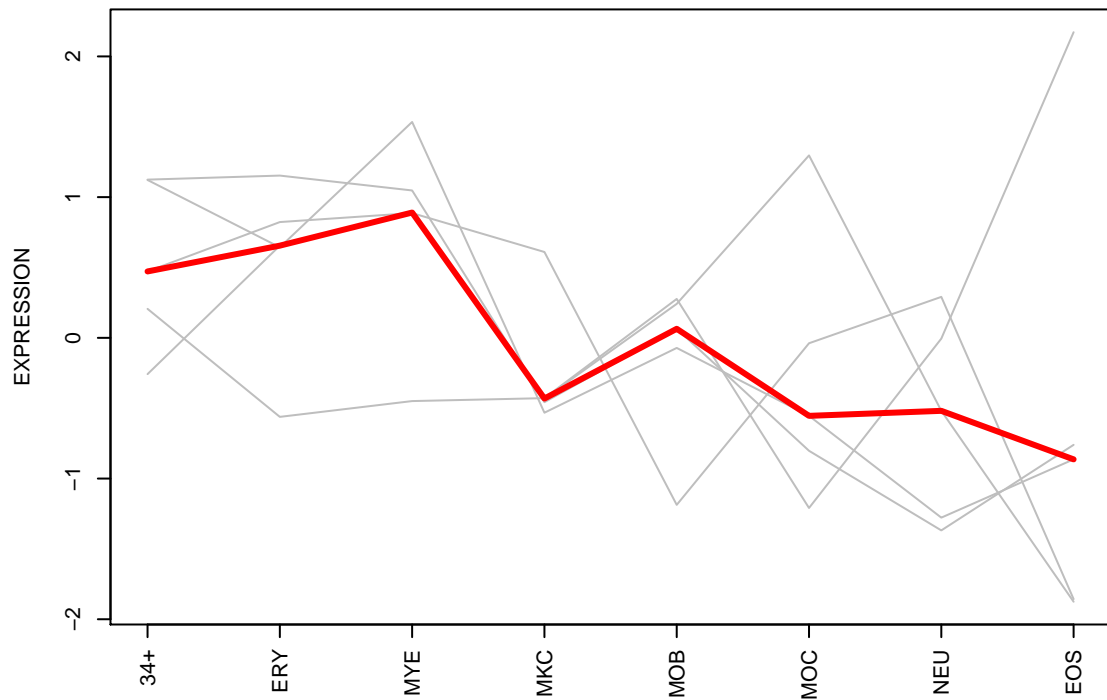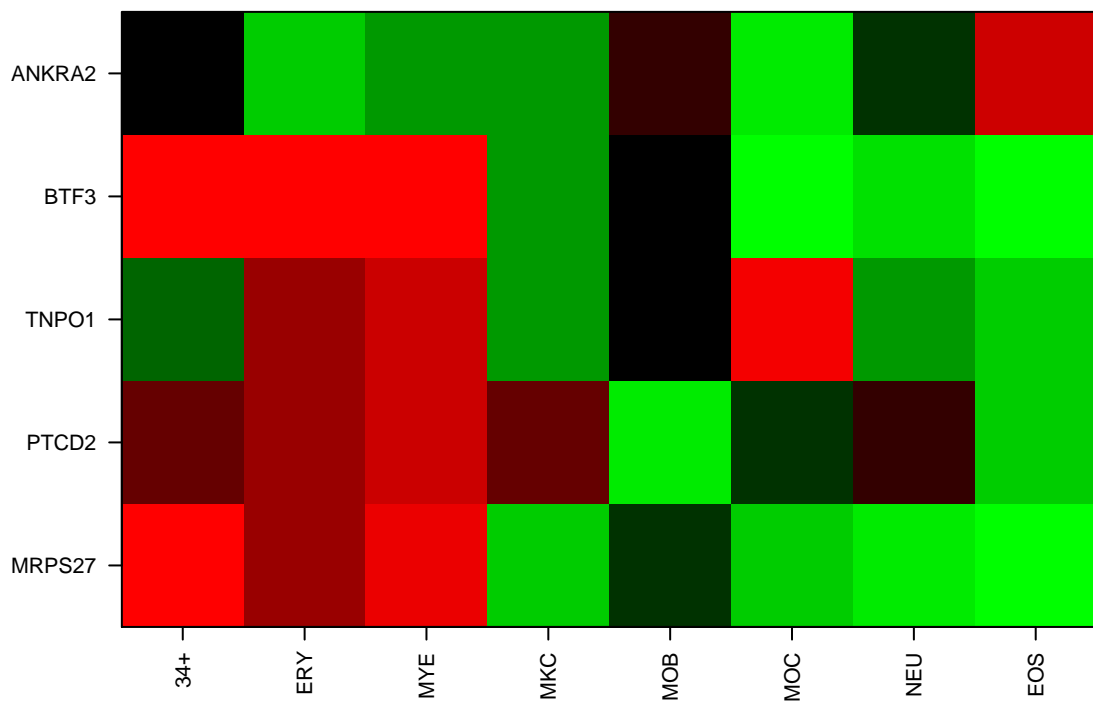



Position chr 5: 171221160–175955375

Number of genes 14

Median correlation 0.24

Third quartile correlations 0.54

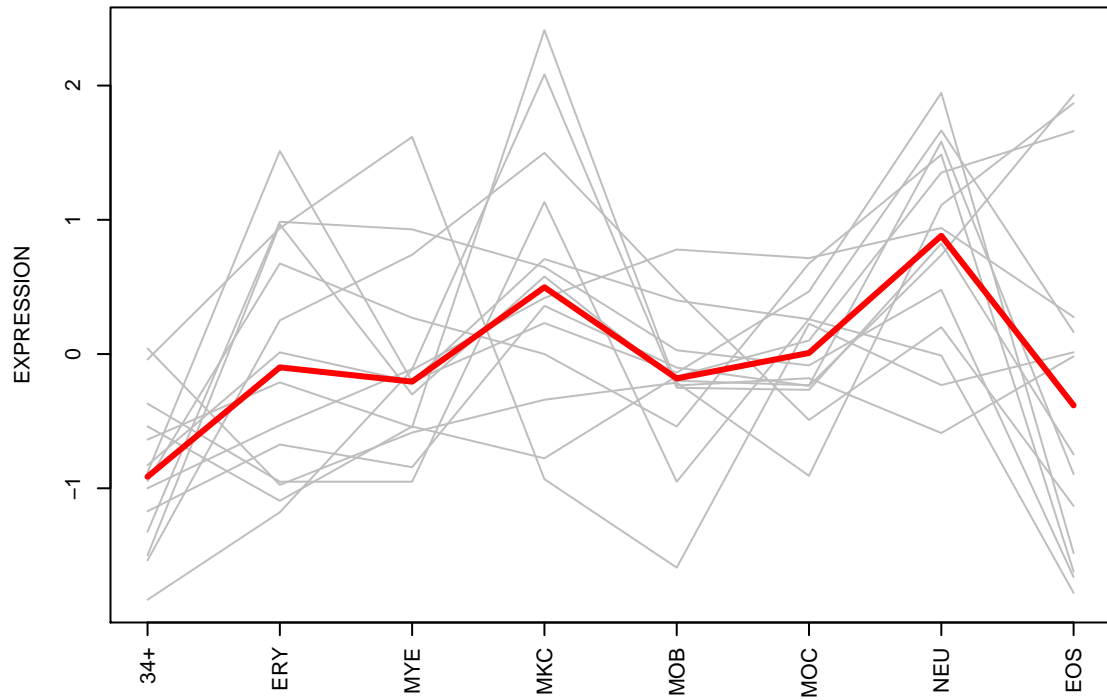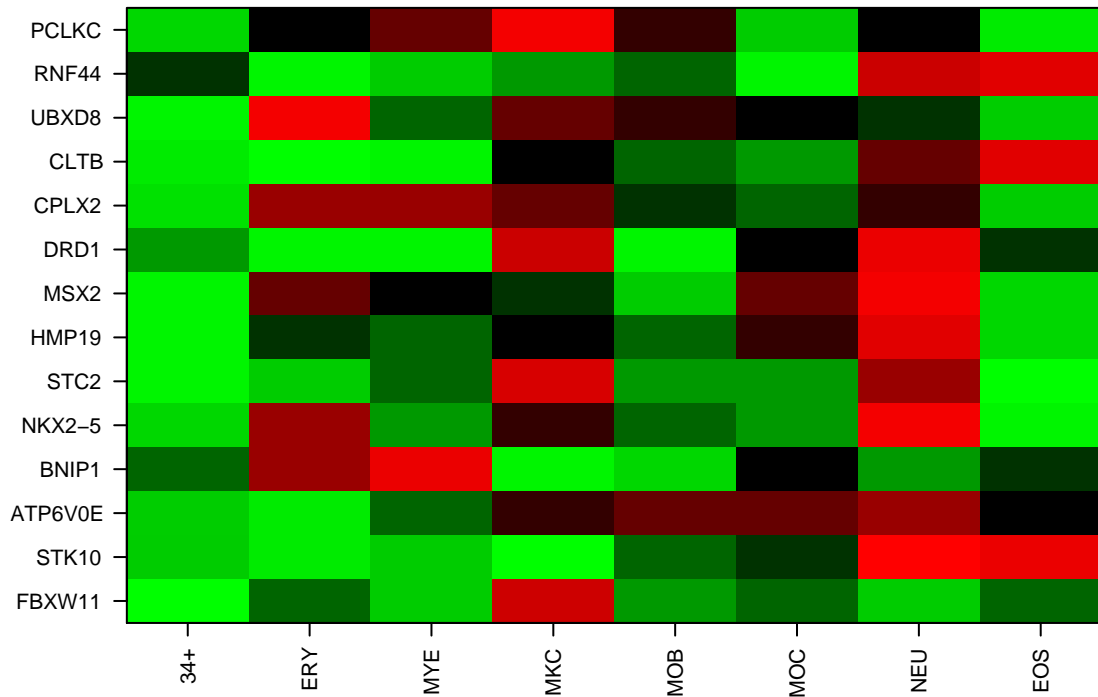

Position chr 6: 62447823–74420411

Number of genes 15

Median correlation 0.3

Third quartile correlations 0.6

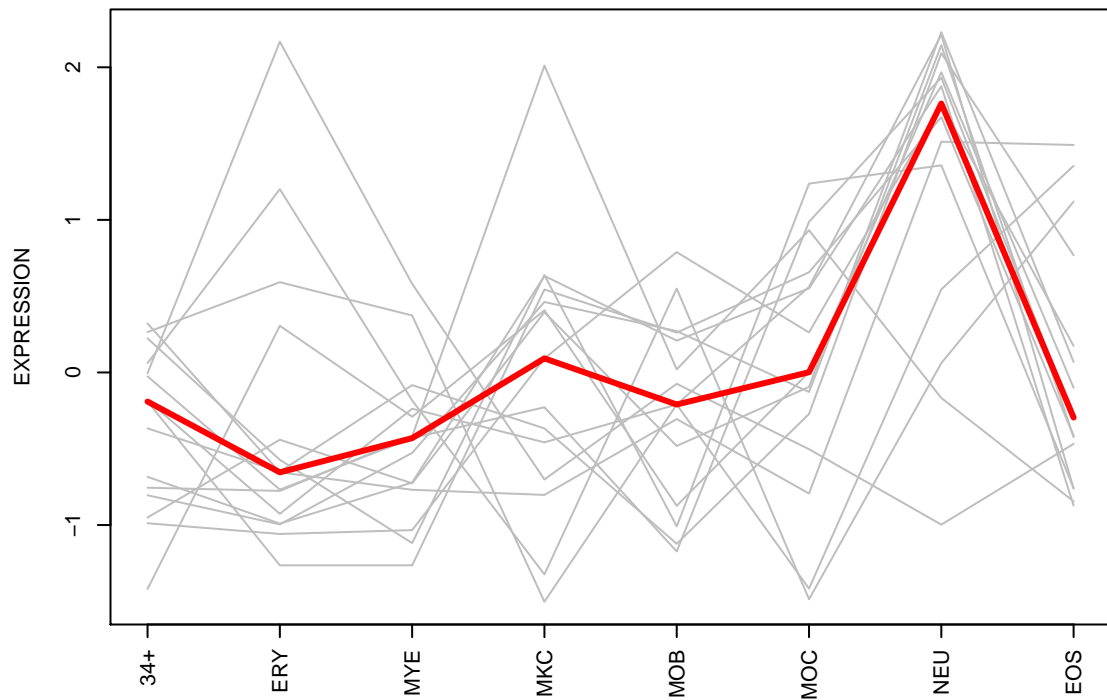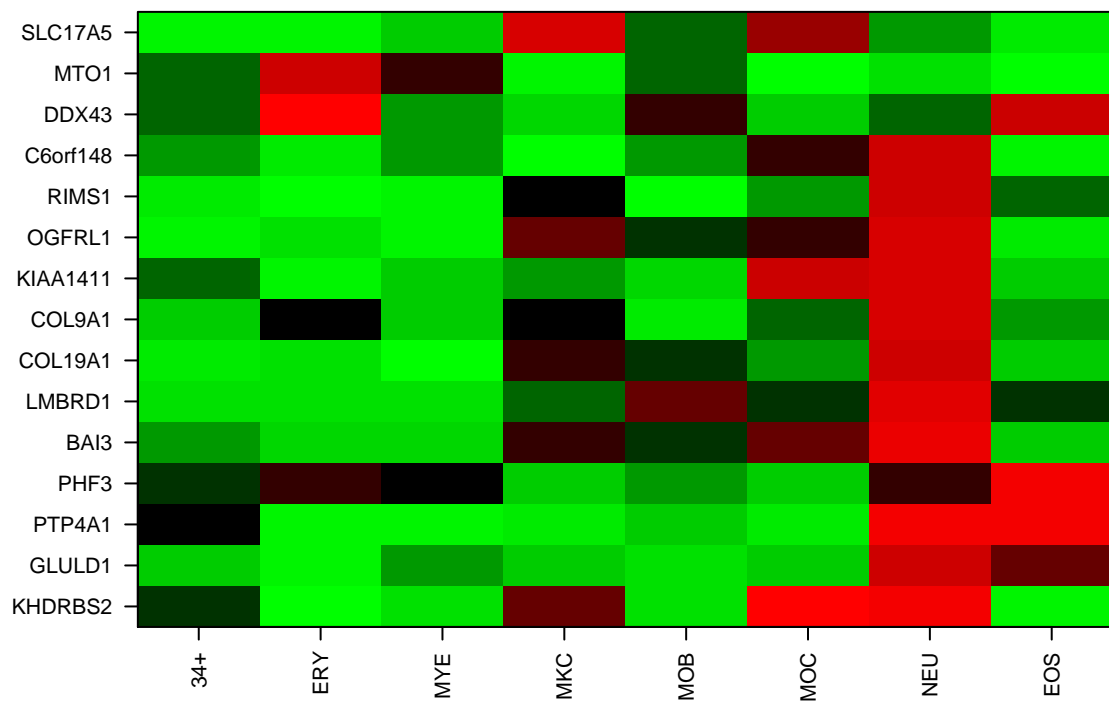

Position chr 7: 54787434–56099176

Number of genes 5

Median correlation 0.46

Third quartile correlations 0.81

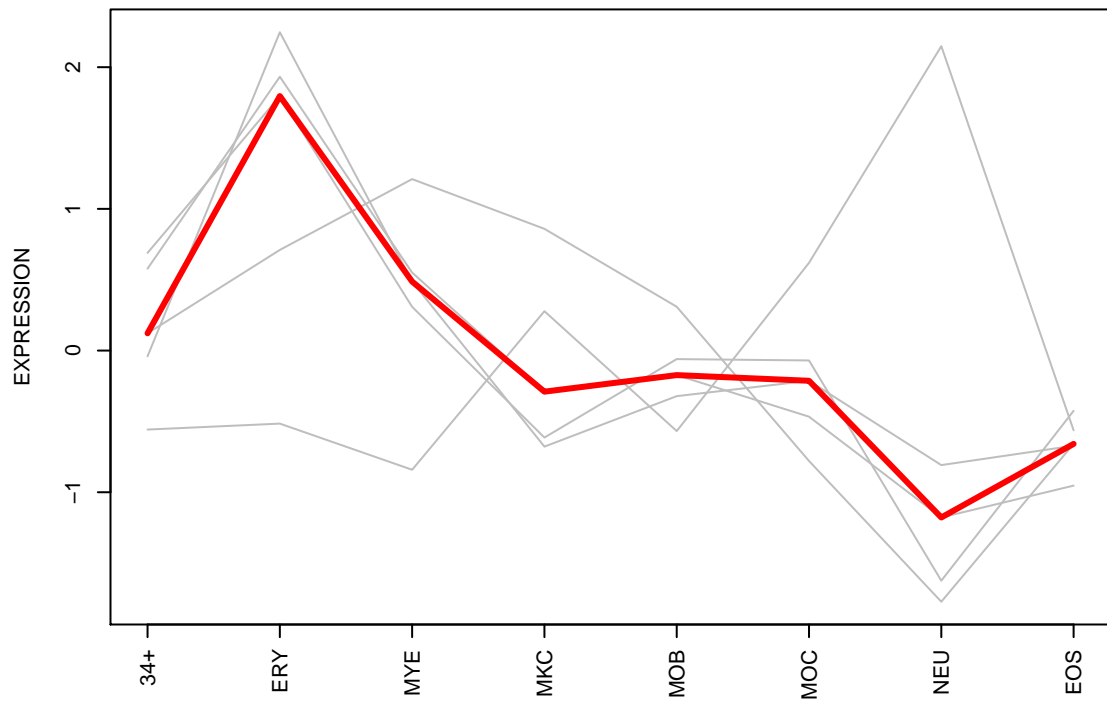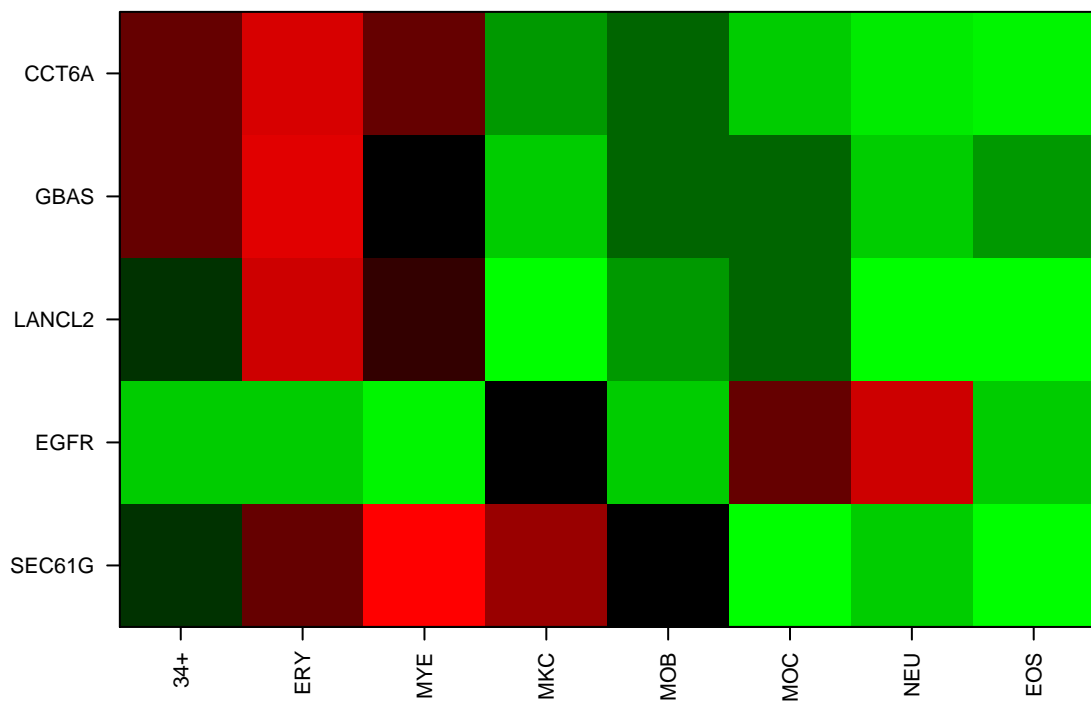

Position chr 7: 119700957–127885706

Number of genes 23

Median correlation 0.14

Third quartile correlations 0.57

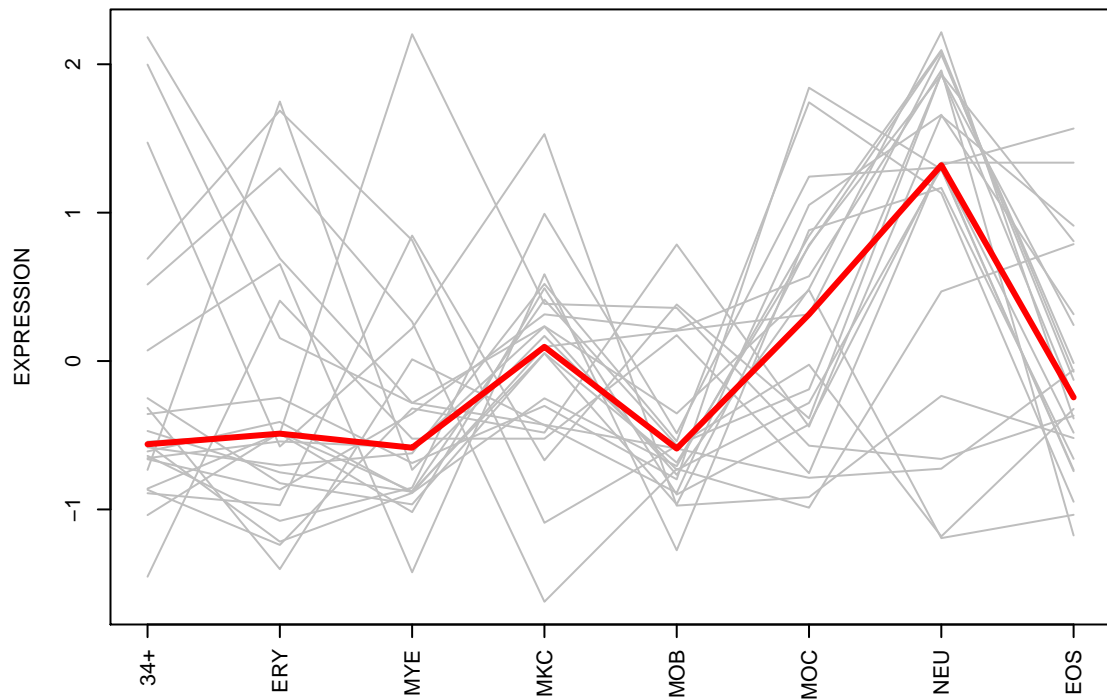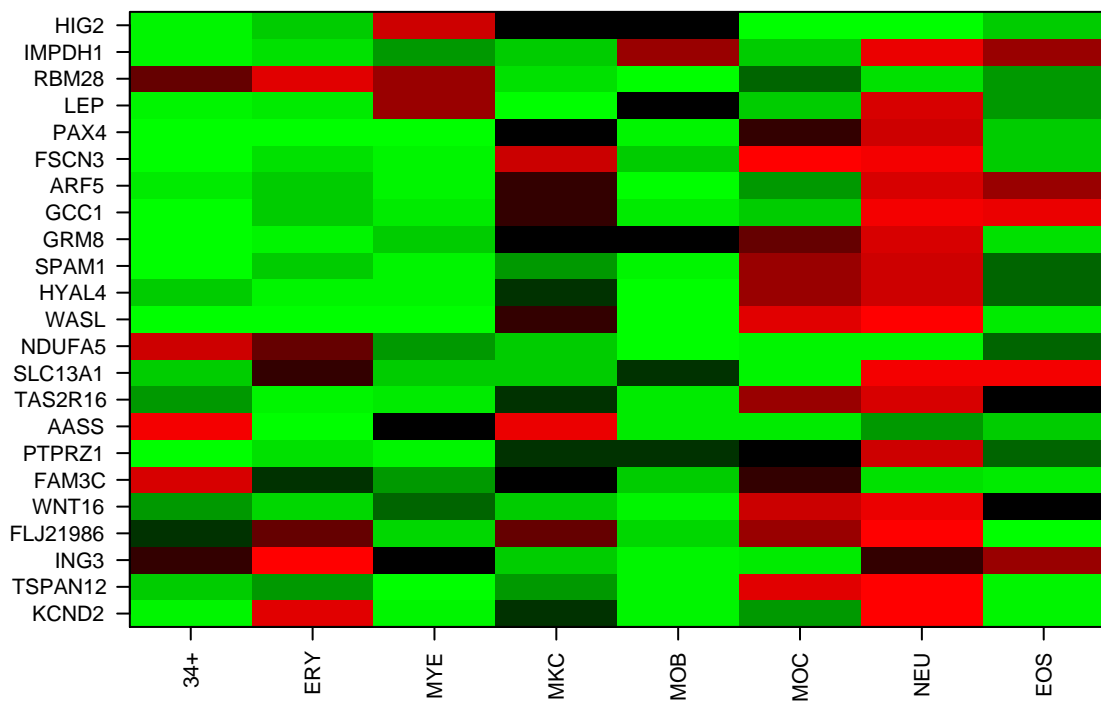

Position chr 11: 5641363–9243447

Number of genes 27

Median correlation 0.2

Third quartile correlations 0.64

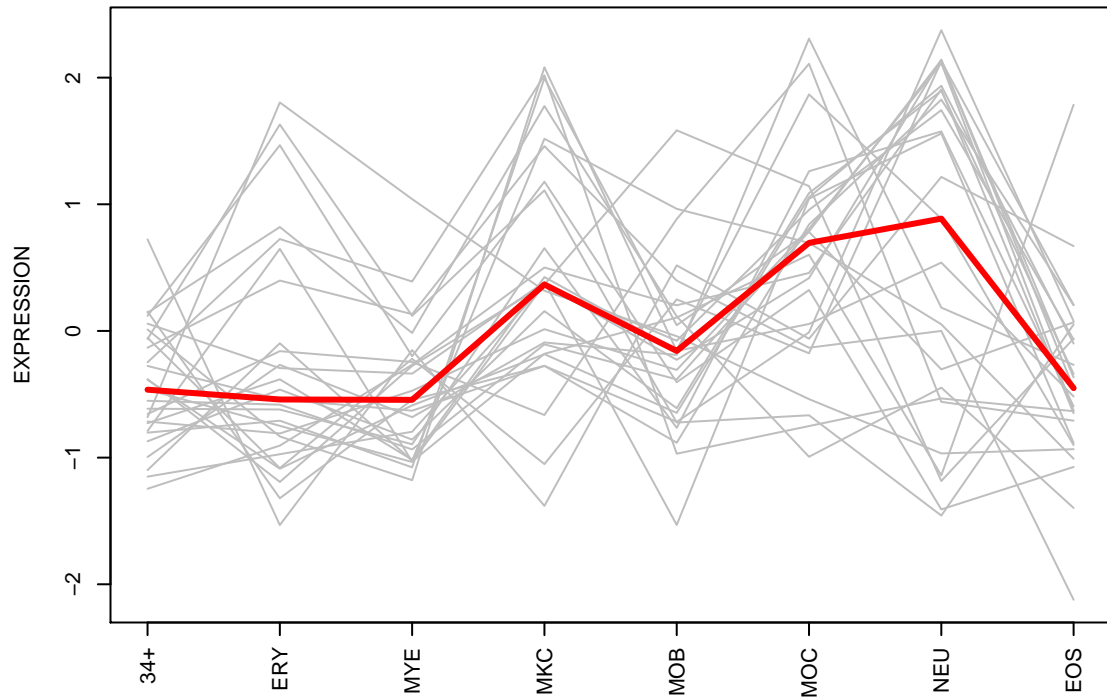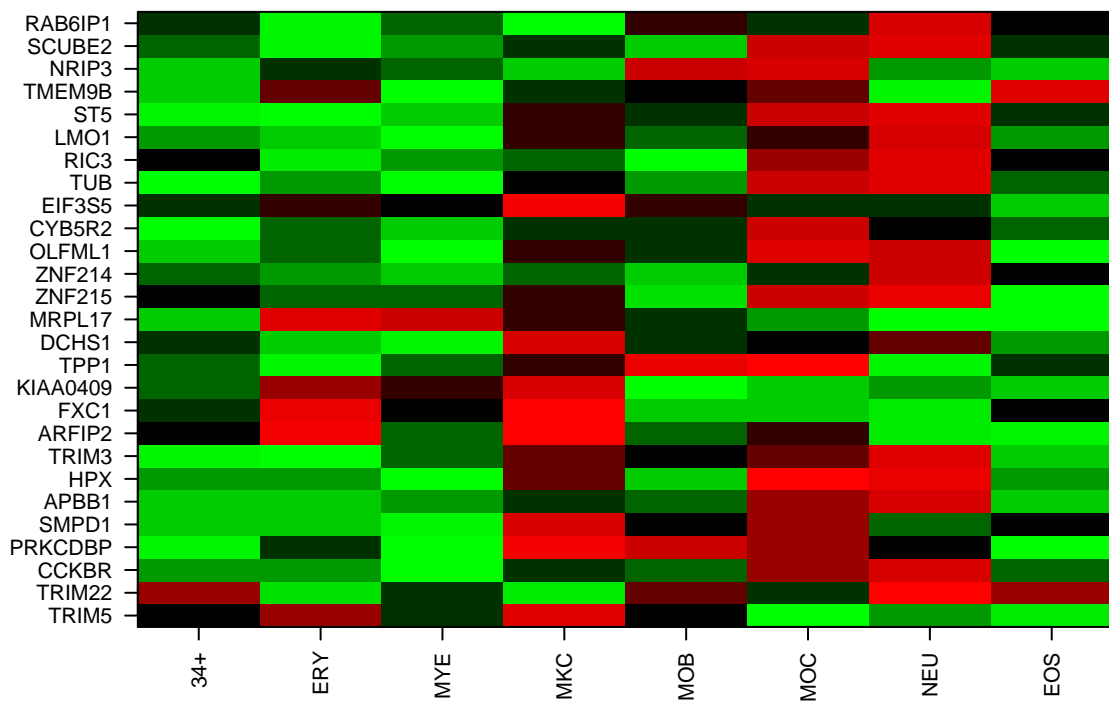

Position chr 11: 19691487–22791122

Number of genes 8

Median correlation 0.13

Third quartile correlations 0.55

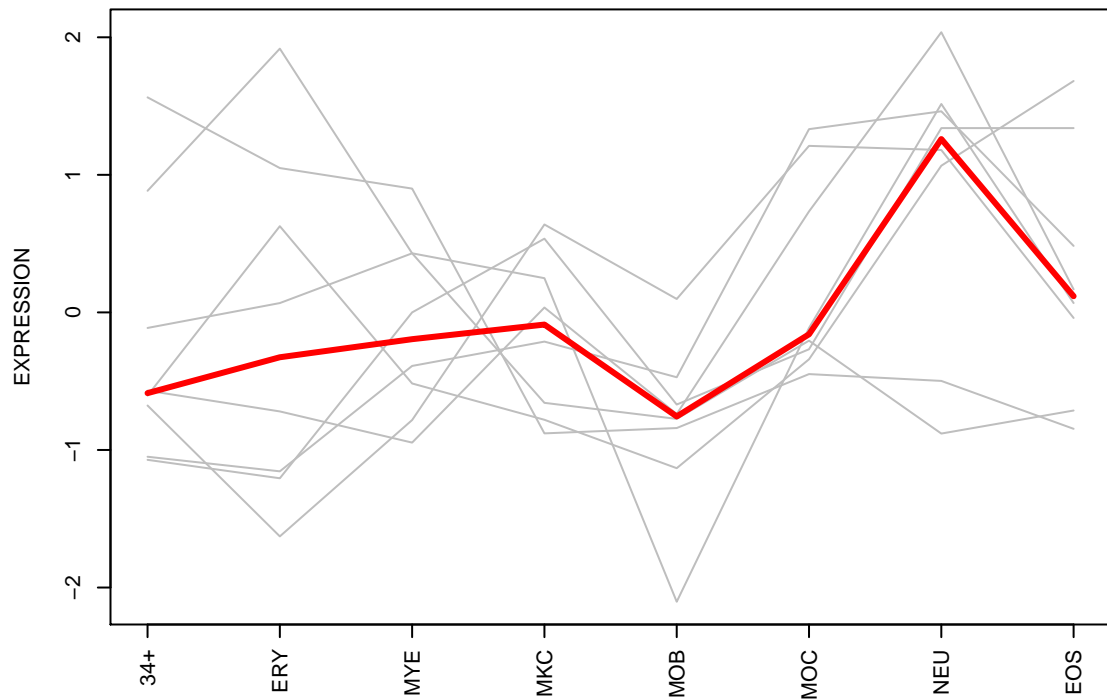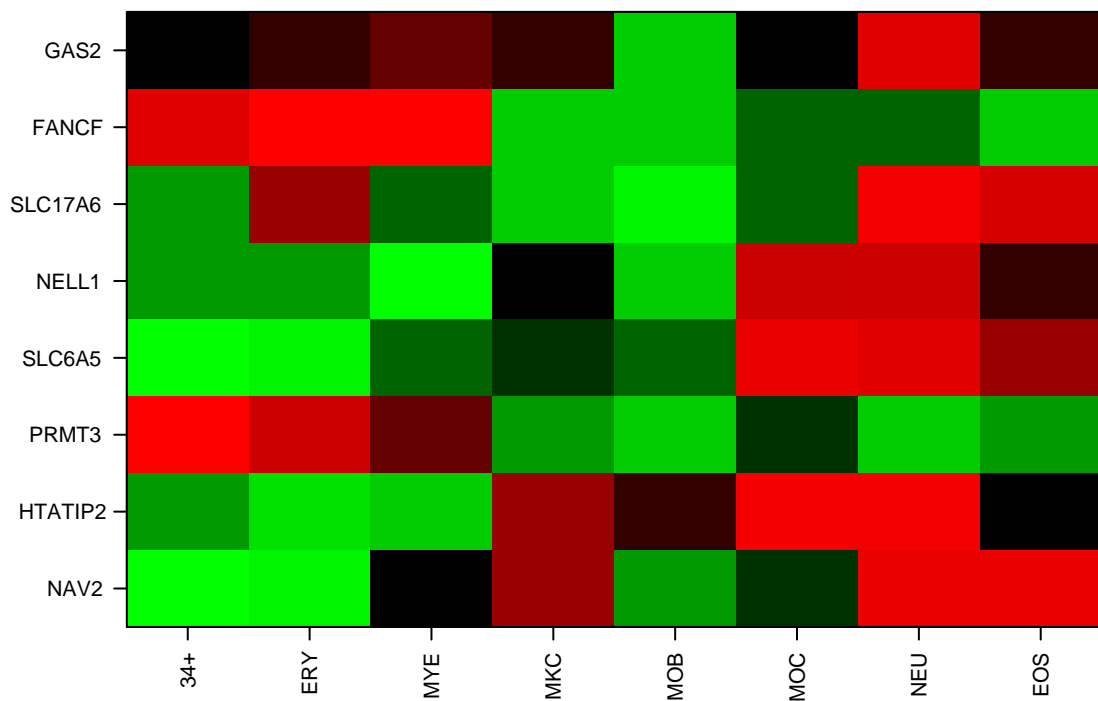

Position chr 12: 69318128–71345688

Number of genes 8

Median correlation 0.51

Third quartile correlations 0.7

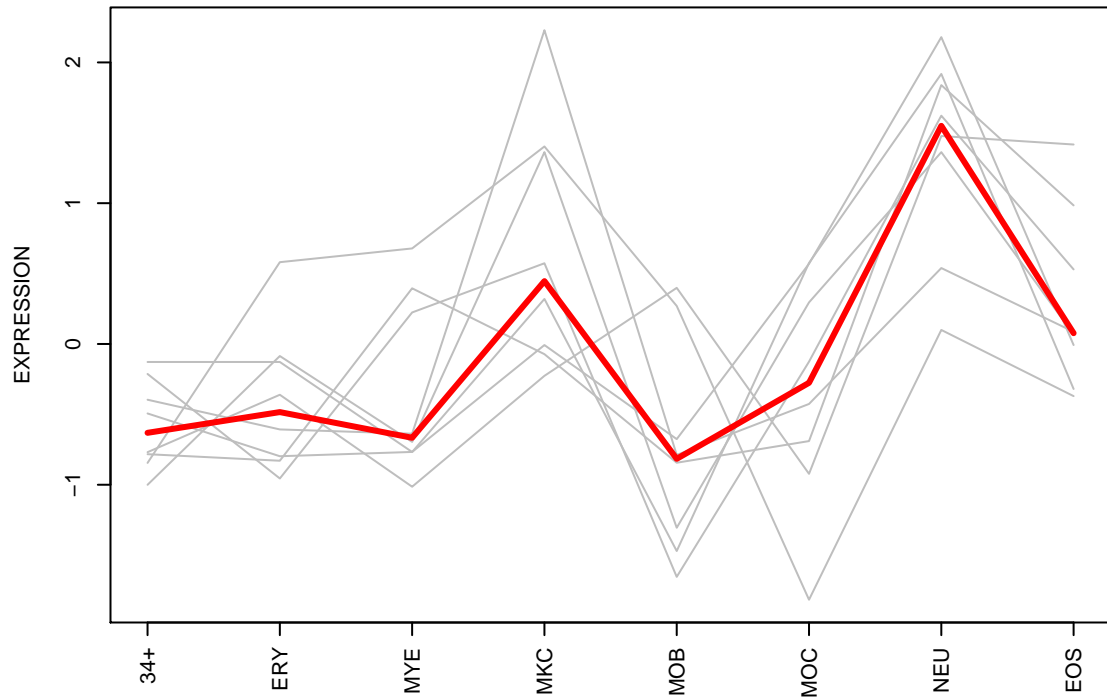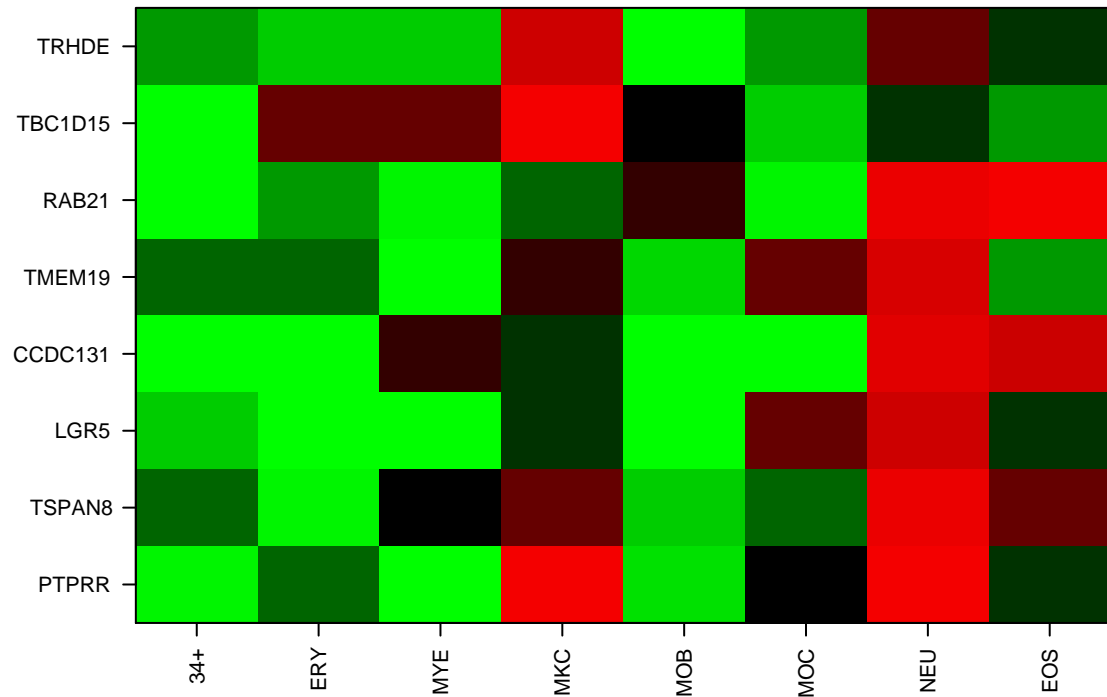

Position chr 12: 81270750–90100937

Number of genes 13

Median correlation 0.27

Third quartile correlations 0.55

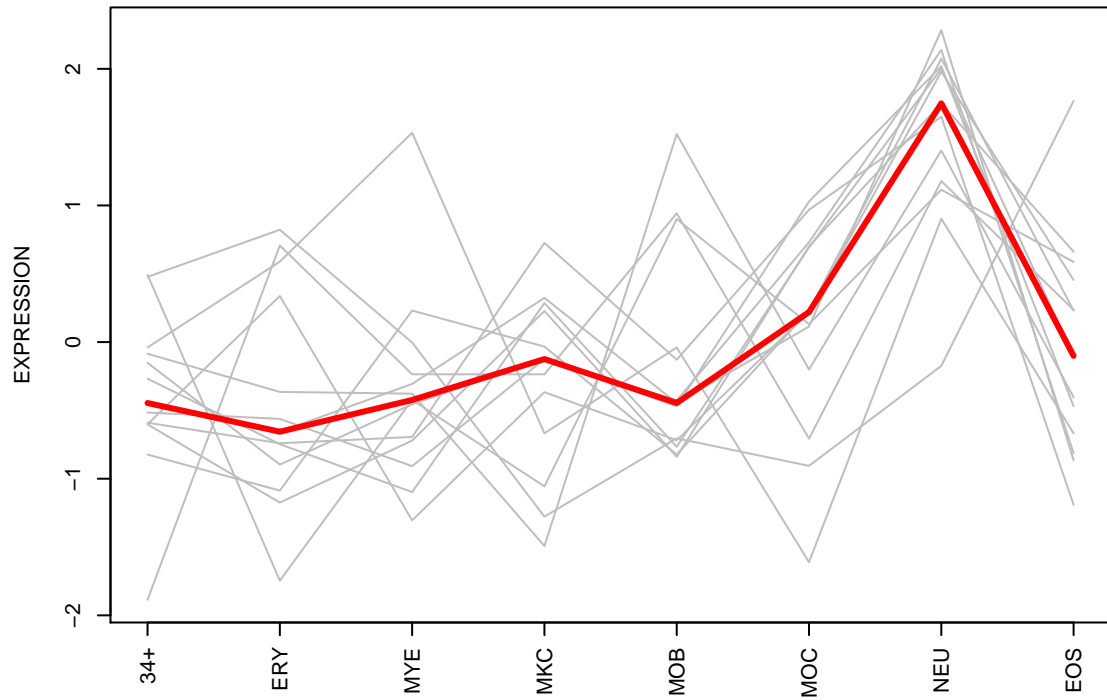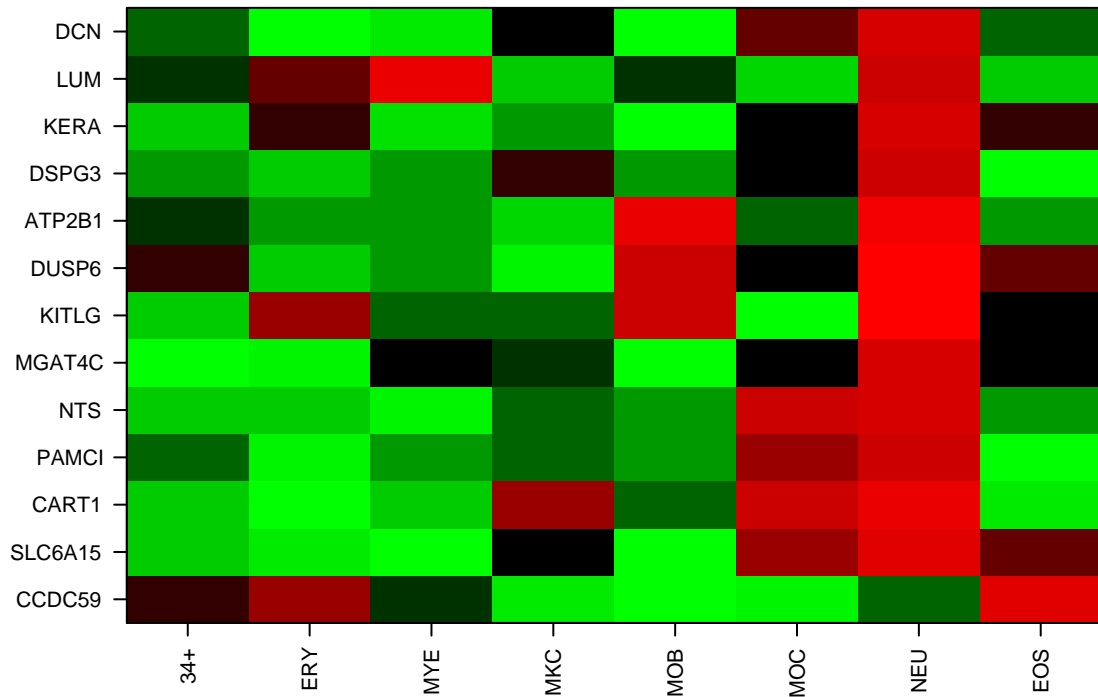



Position chr 12: 121915834–124193824

Number of genes 13

Median correlation 0.35

Third quartile correlations 0.62

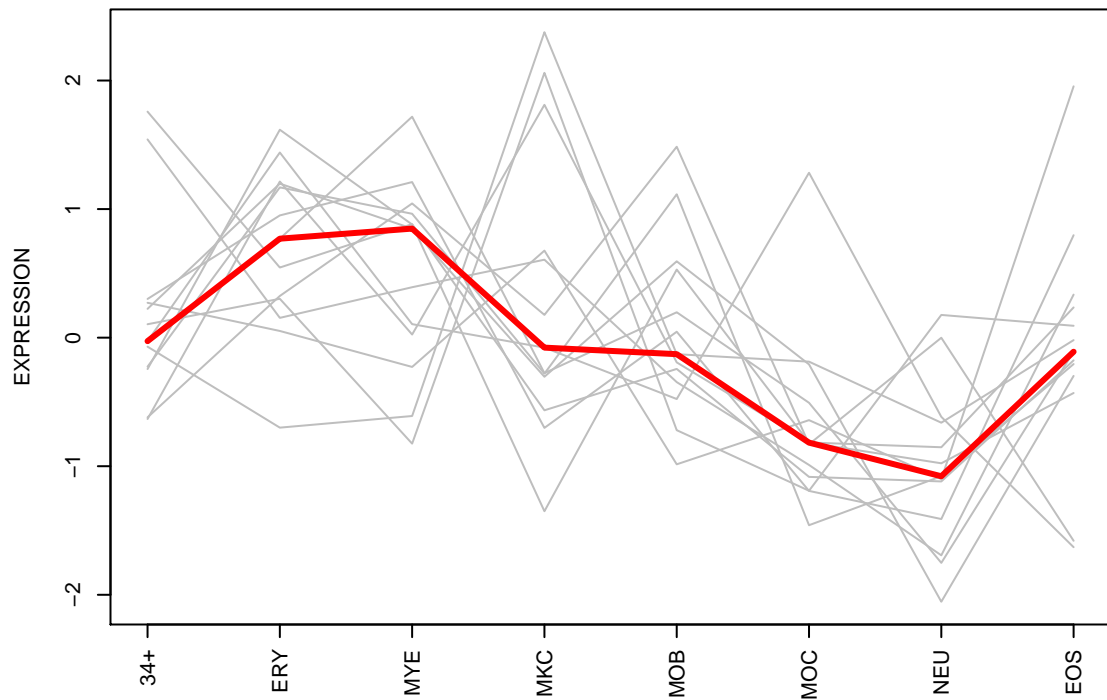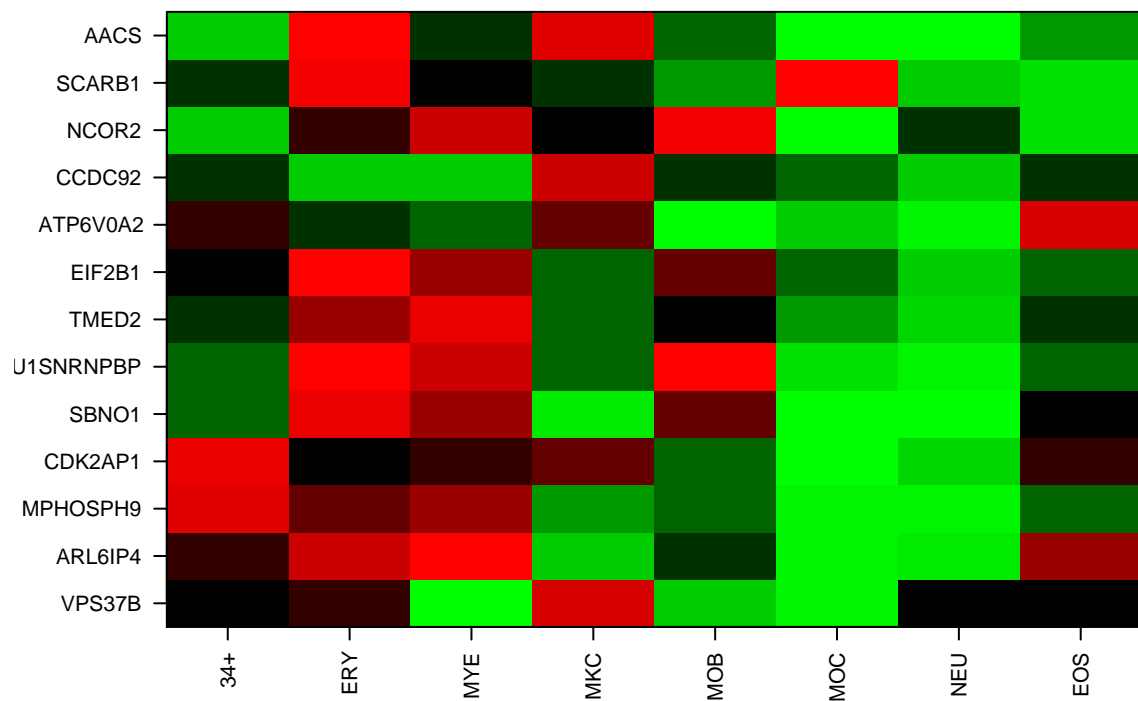

Position chr 14: 44742143–49431484

Number of genes 8

Median correlation 0.56

Third quartile correlations 0.73

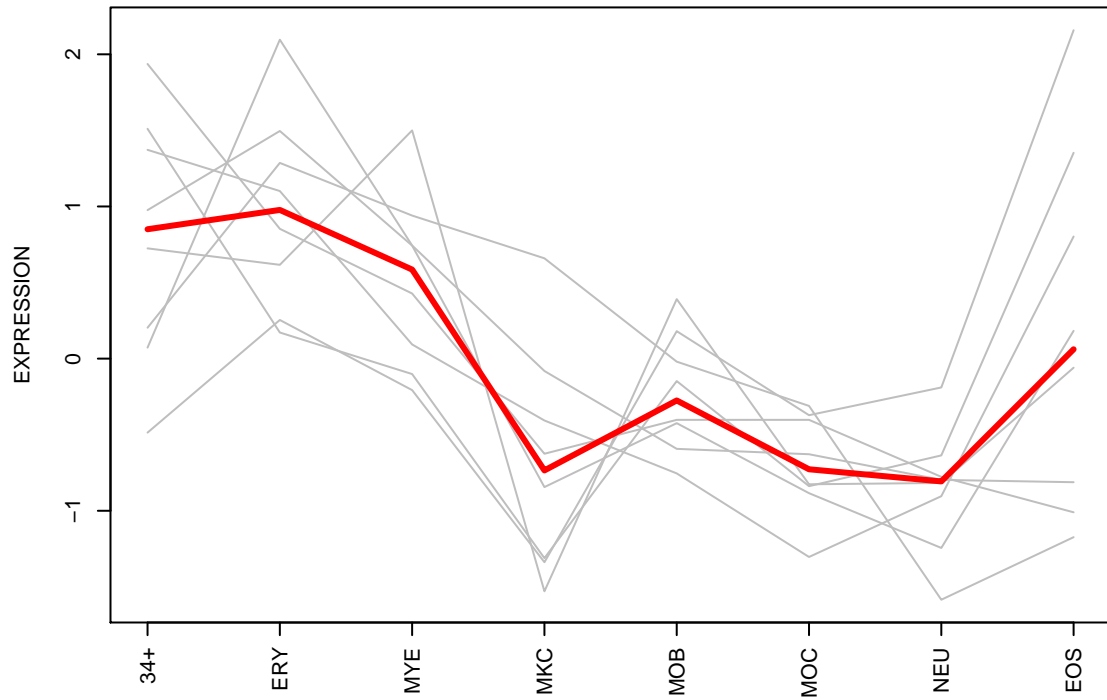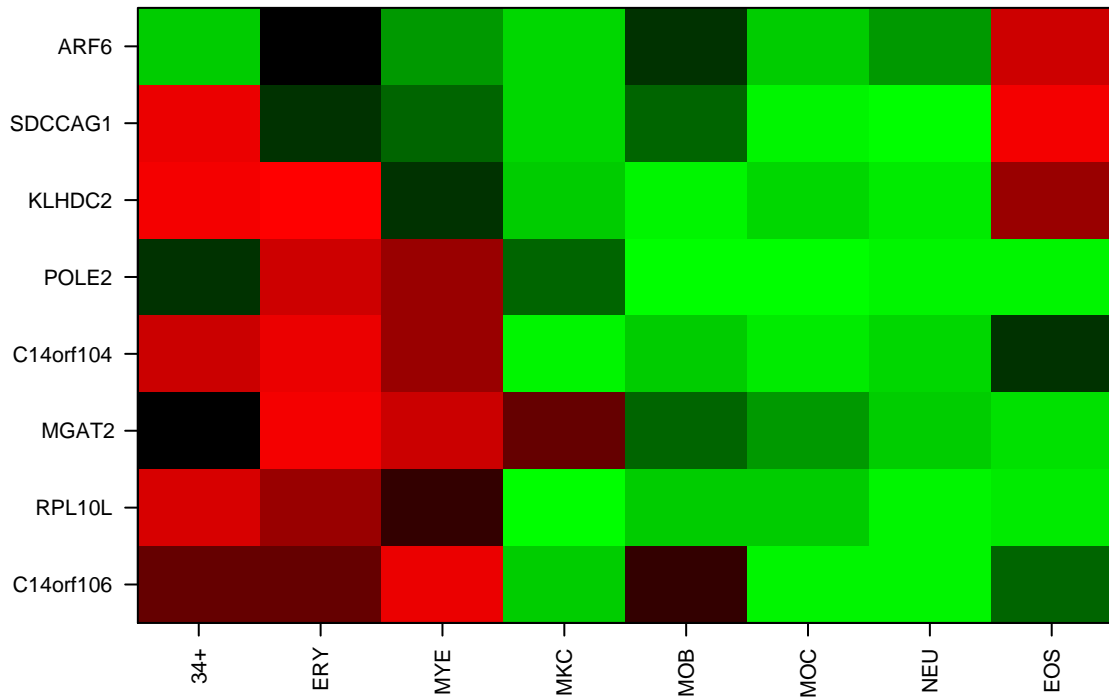

Position chr 17: 36332477–37828800

Number of genes 28

Median correlation 0.24

Third quartile correlations 0.55

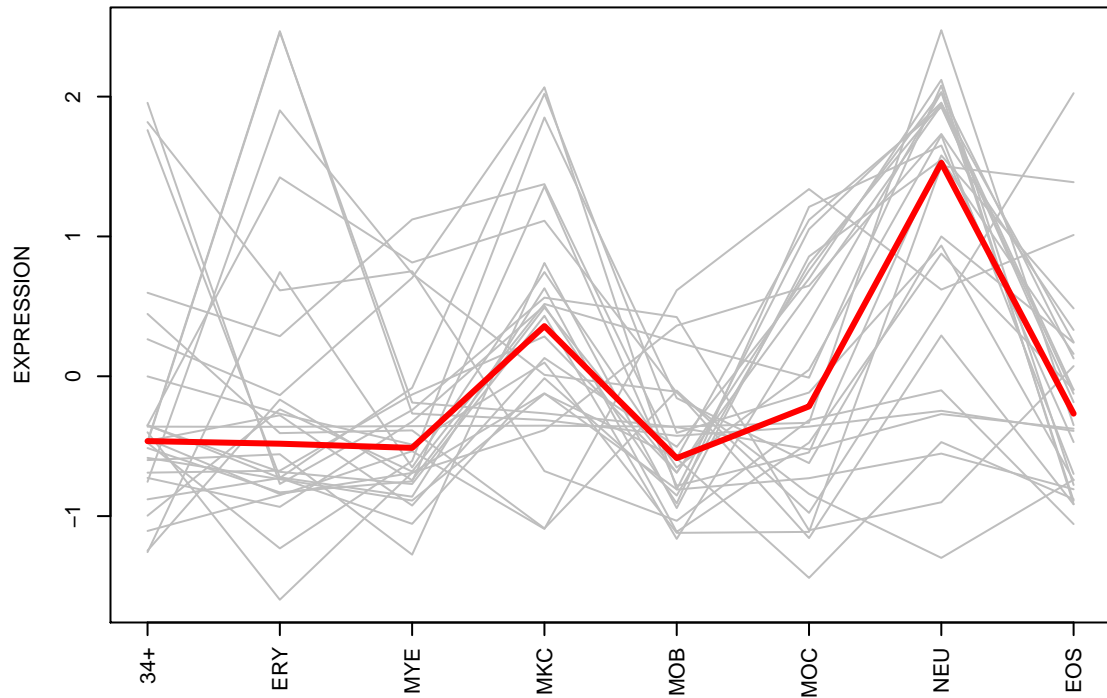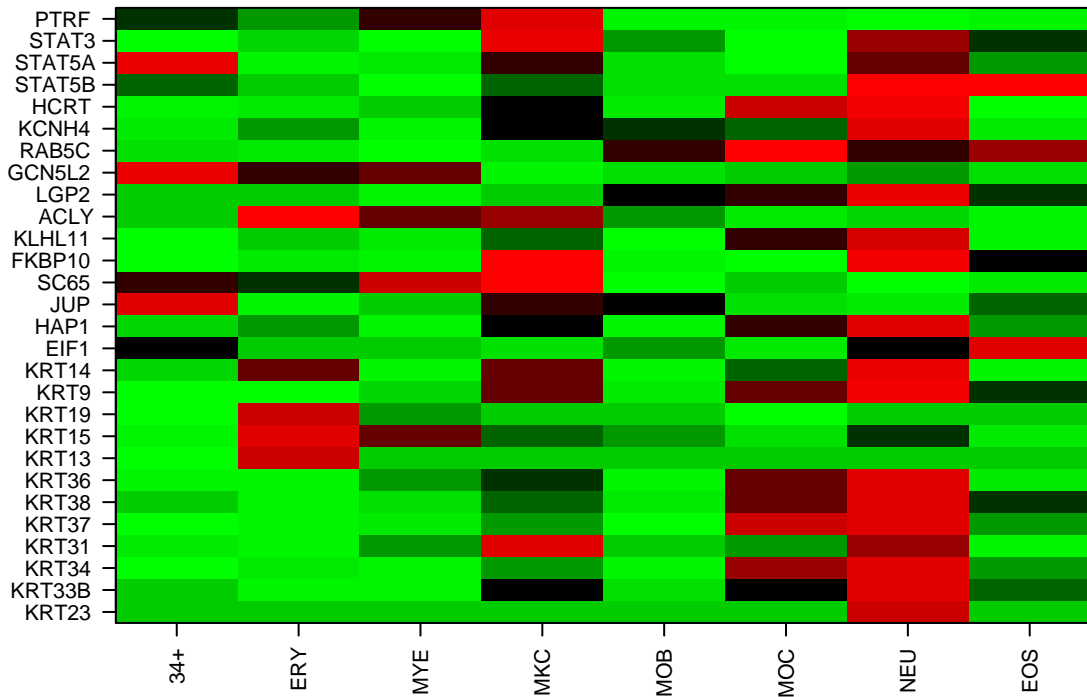

Position chr 17: 61638613–67634147

Number of genes 18

Median correlation 0.4

Third quartile correlations 0.67

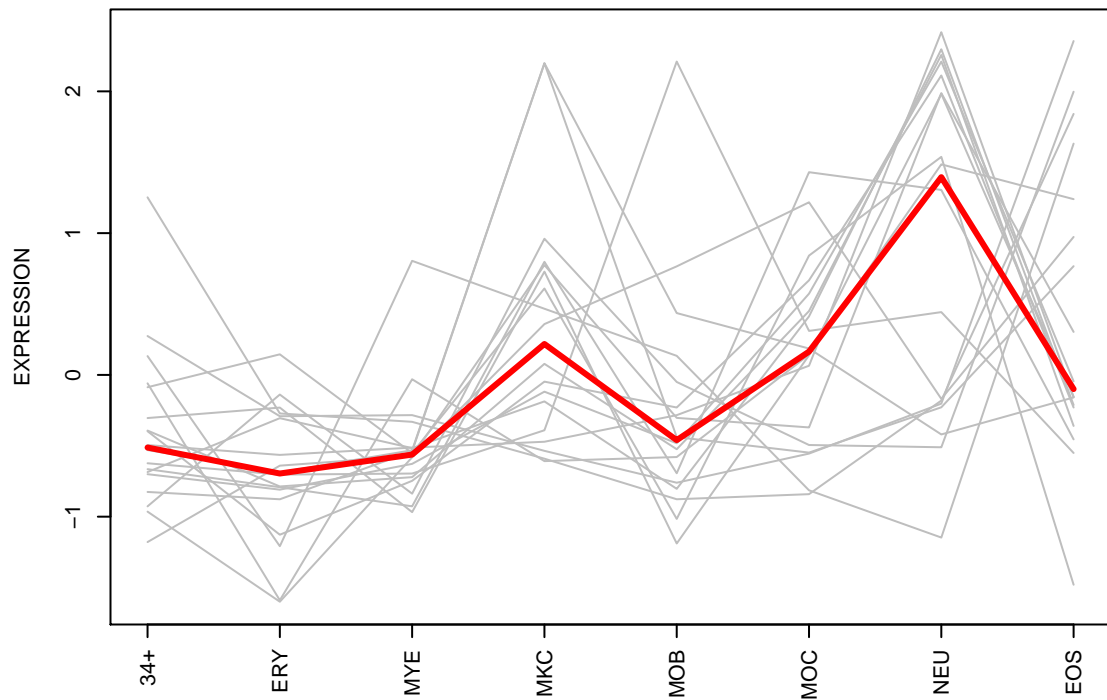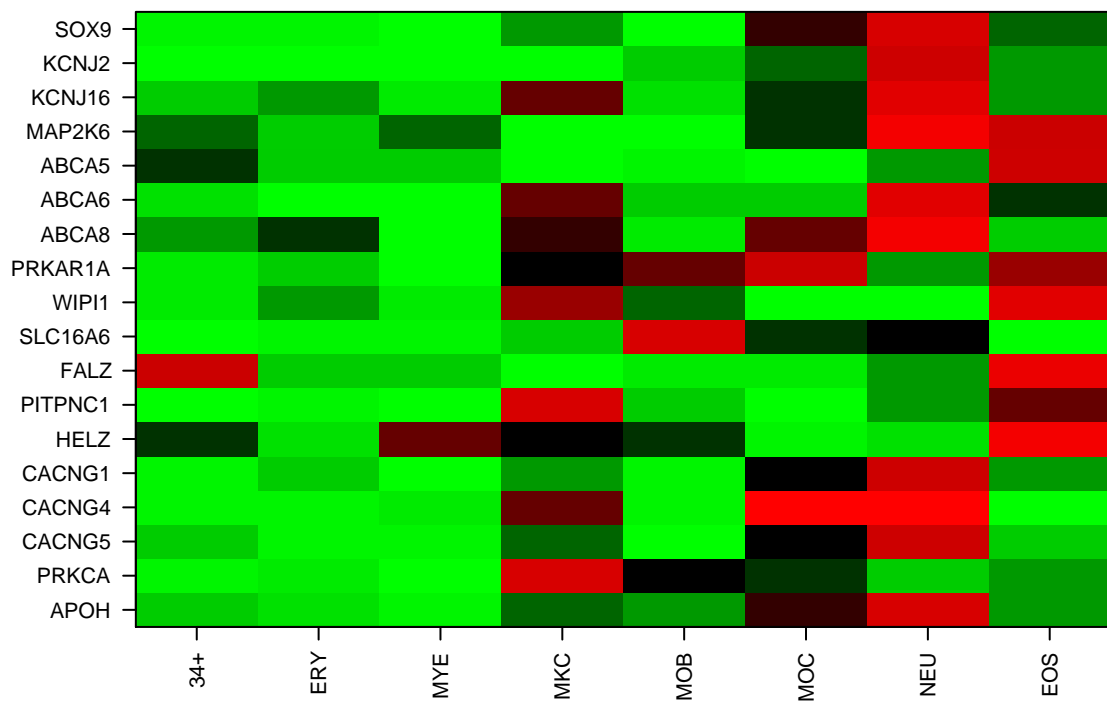

Position chr 20: 6003492–9459171

Number of genes 7

Median correlation 0.57

Third quartile correlations 0.74

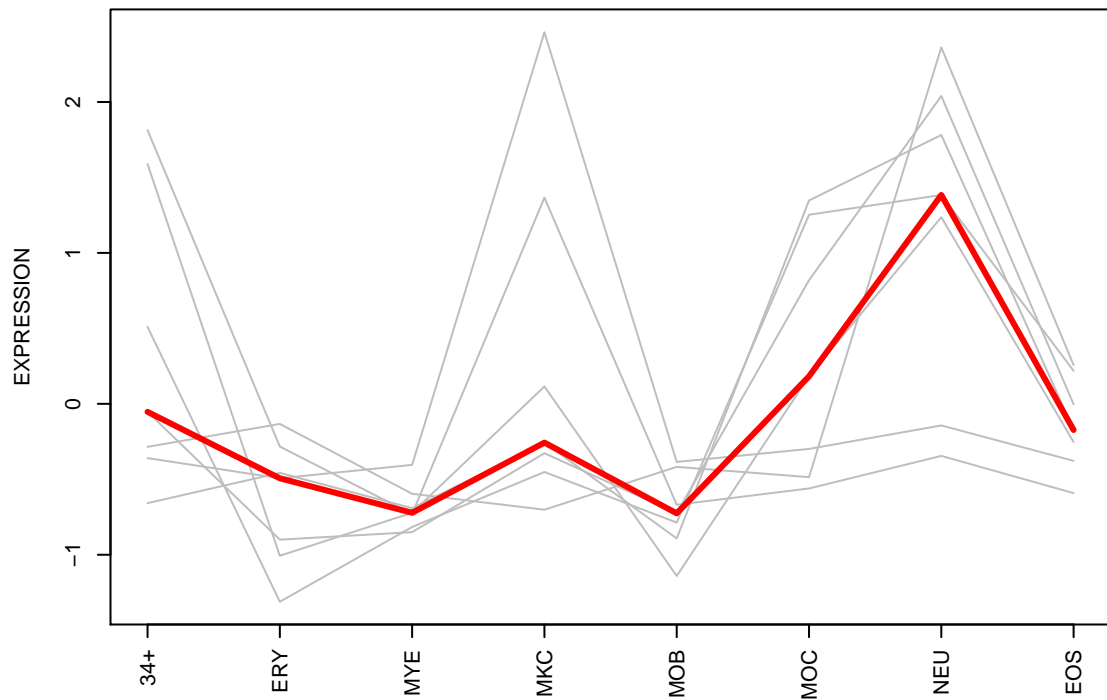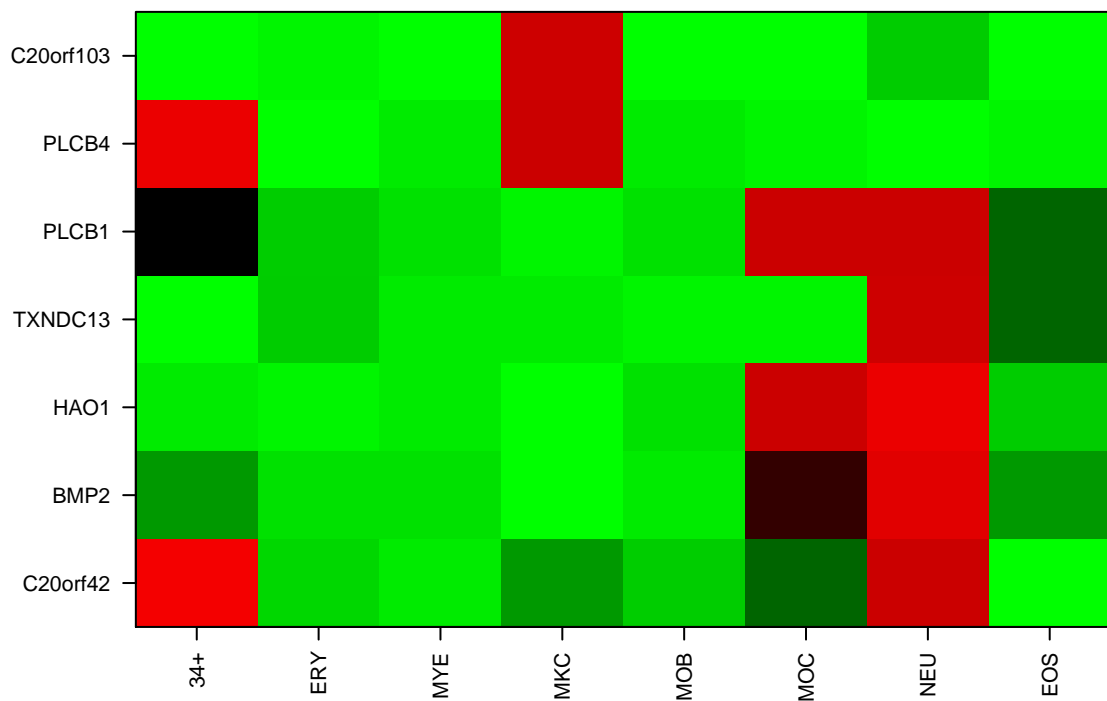

Position chr 20: 20296764–23808380

Number of genes 12

Median correlation 0.38

Third quartile correlations 0.64

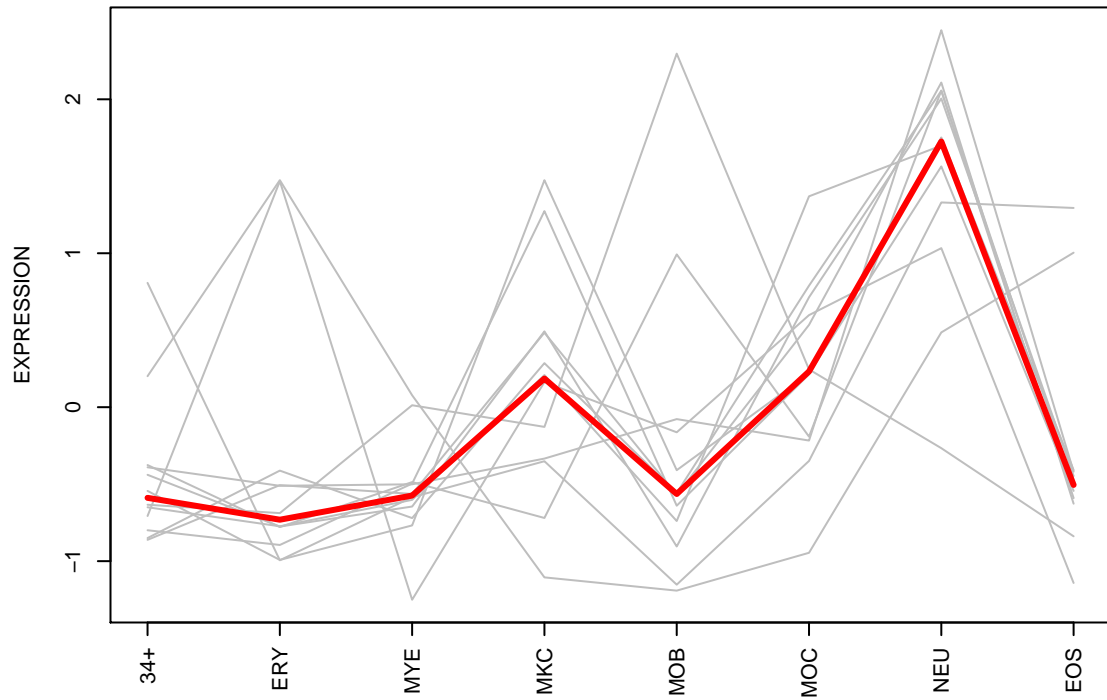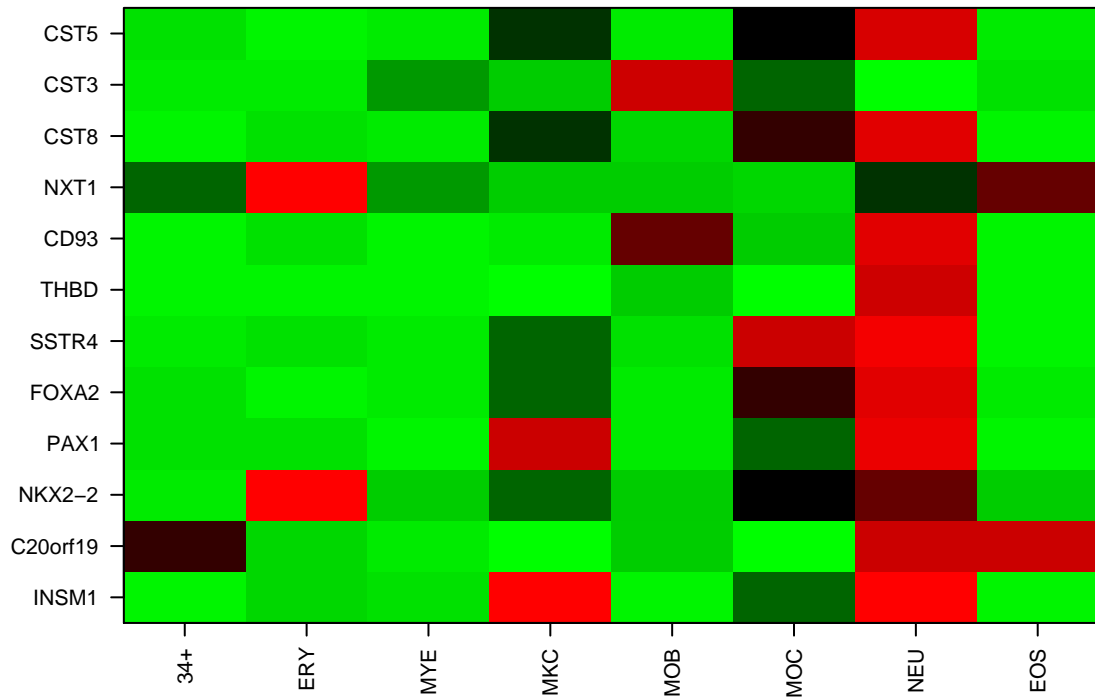

Position chr X: 28515479–38550640

Number of genes 15

Median correlation 0.33

Third quartile correlations 0.62

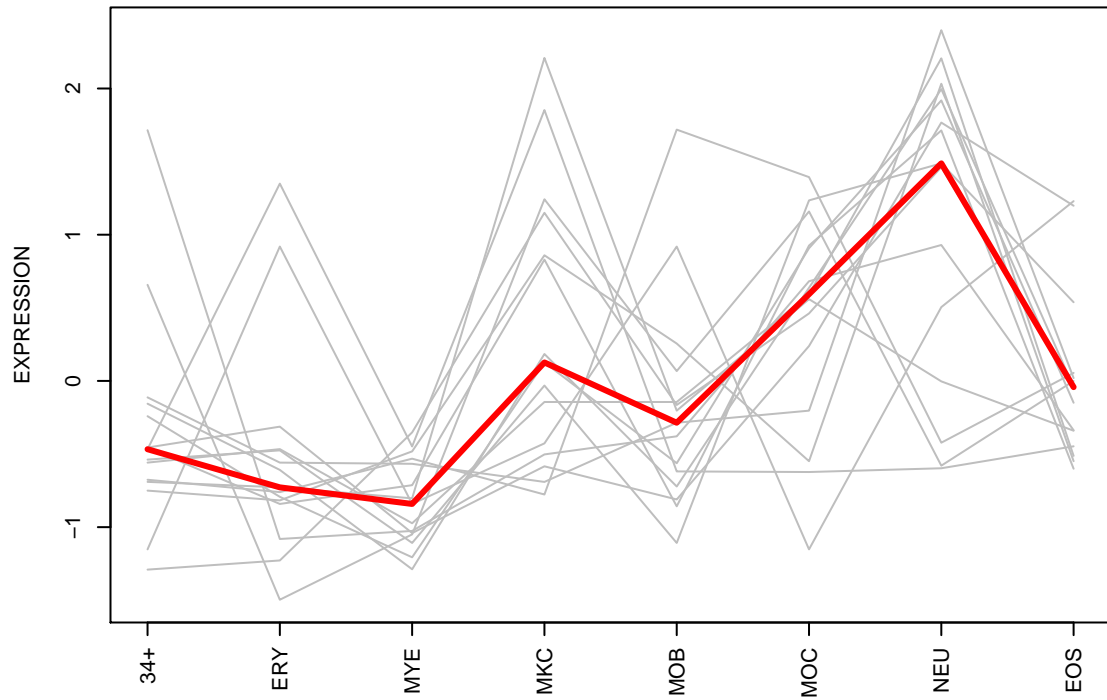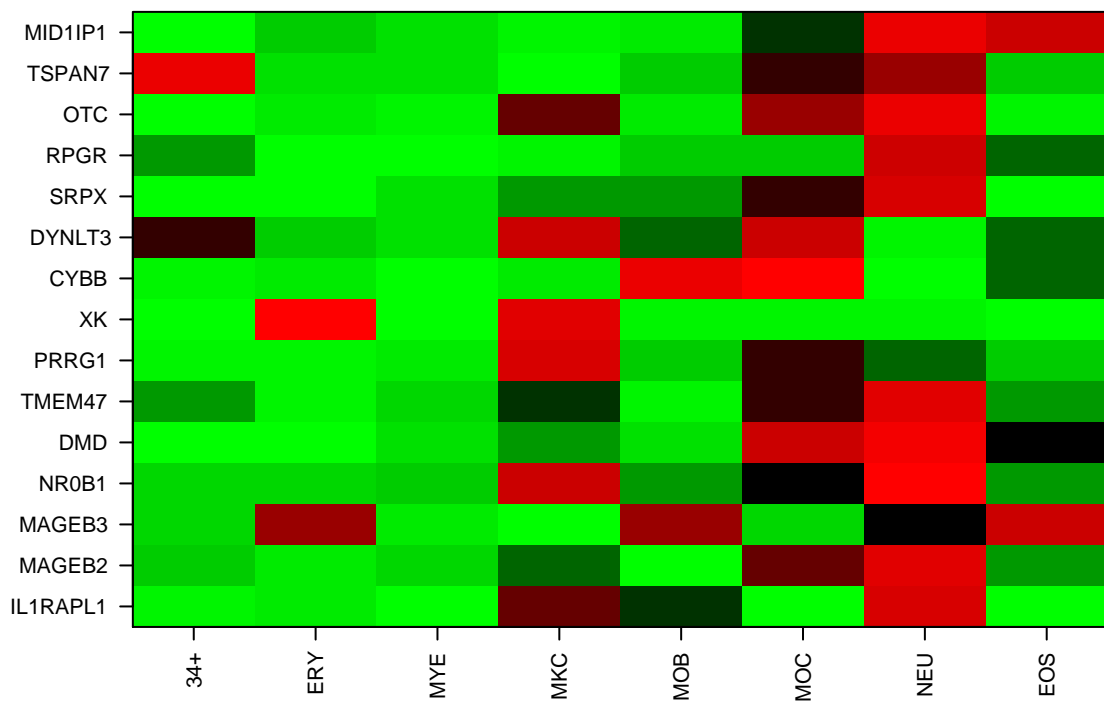

Position chr X: 65732207–70712465

Number of genes 22

Median correlation 0.24

Third quartile correlations 0.61

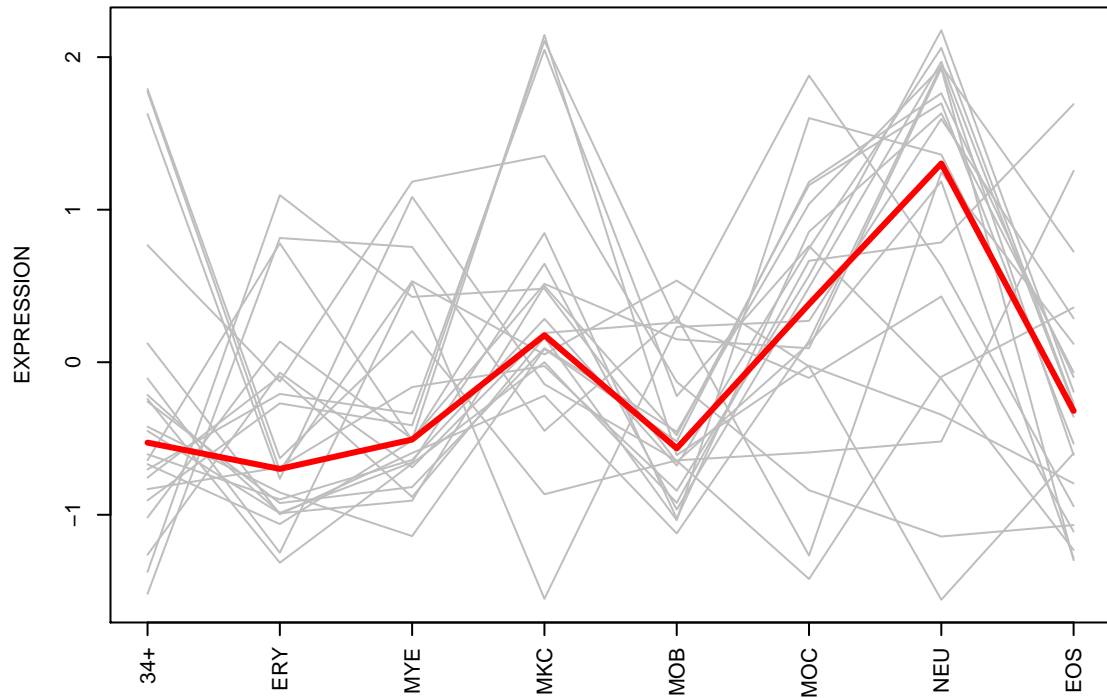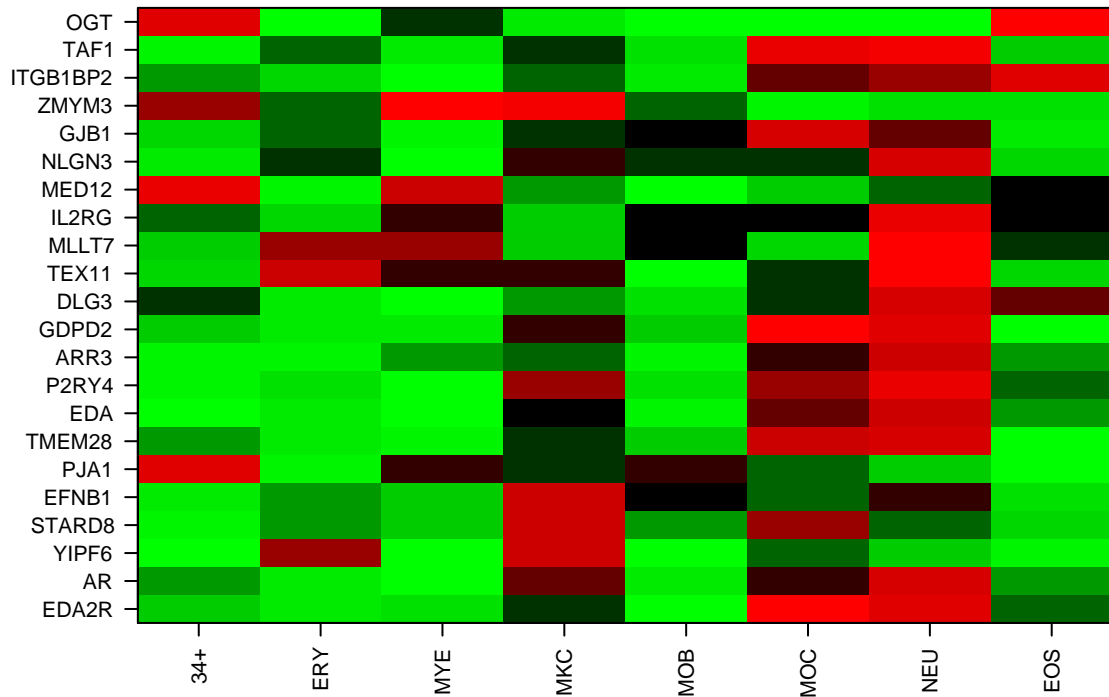



Position chr X: 108502790–115506651

Number of genes 19

Median correlation 0.08

Third quartile correlations 0.57

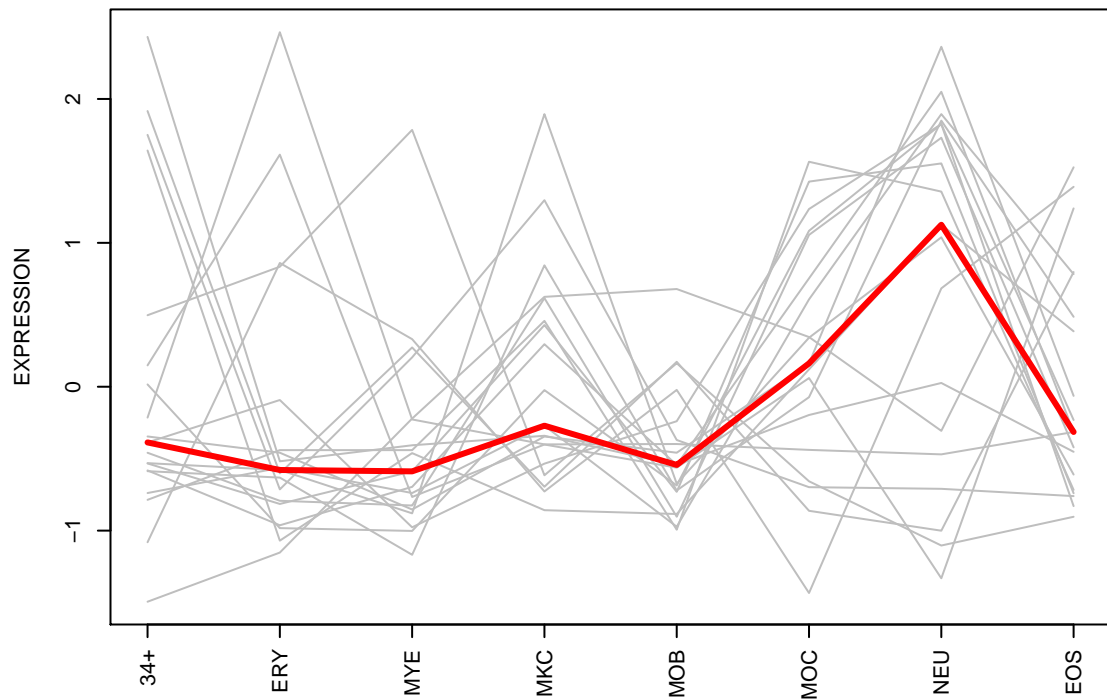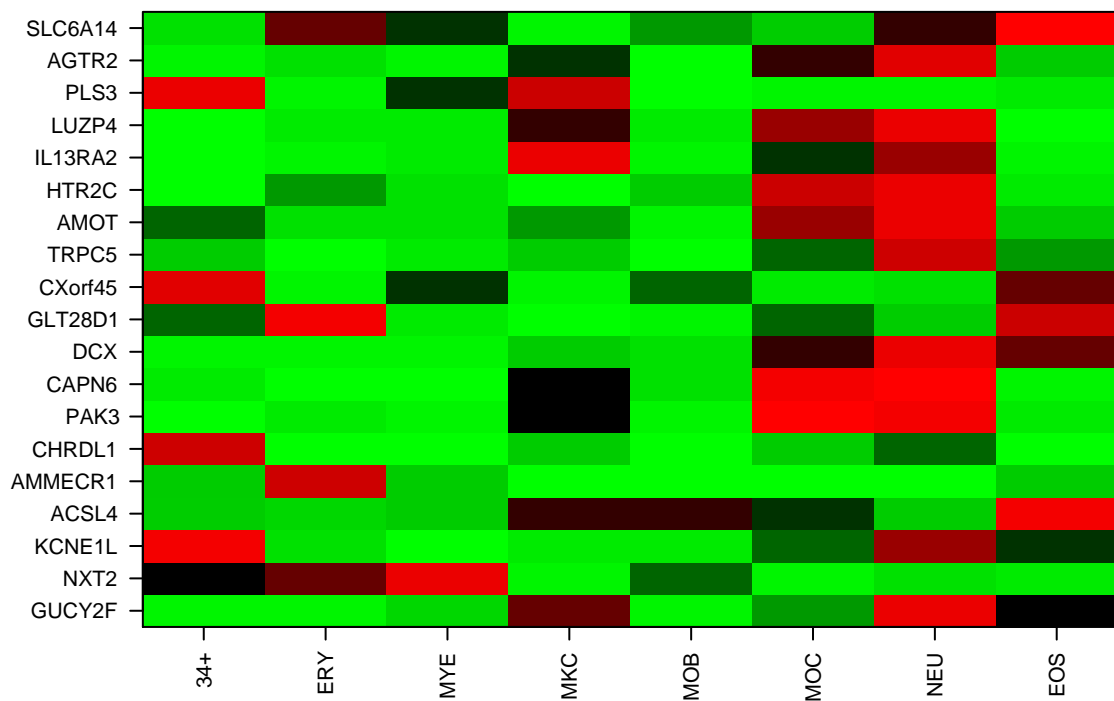

Position chr X: 134895251–151370486

Number of genes 28

Median correlation 0.43

Third quartile correlations 0.71

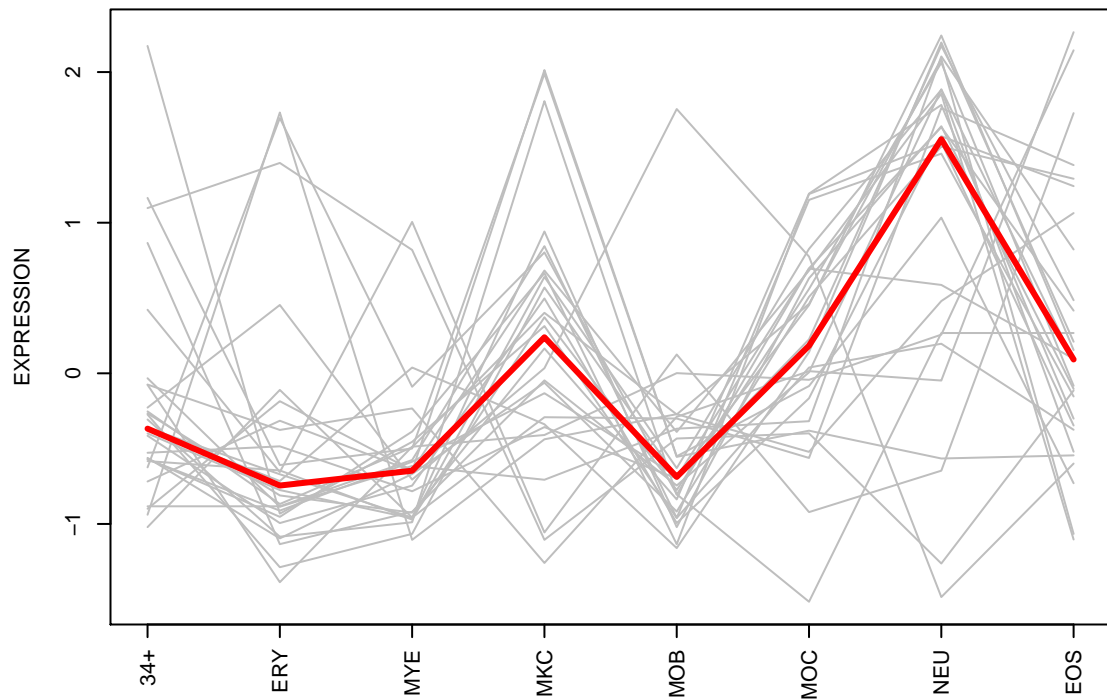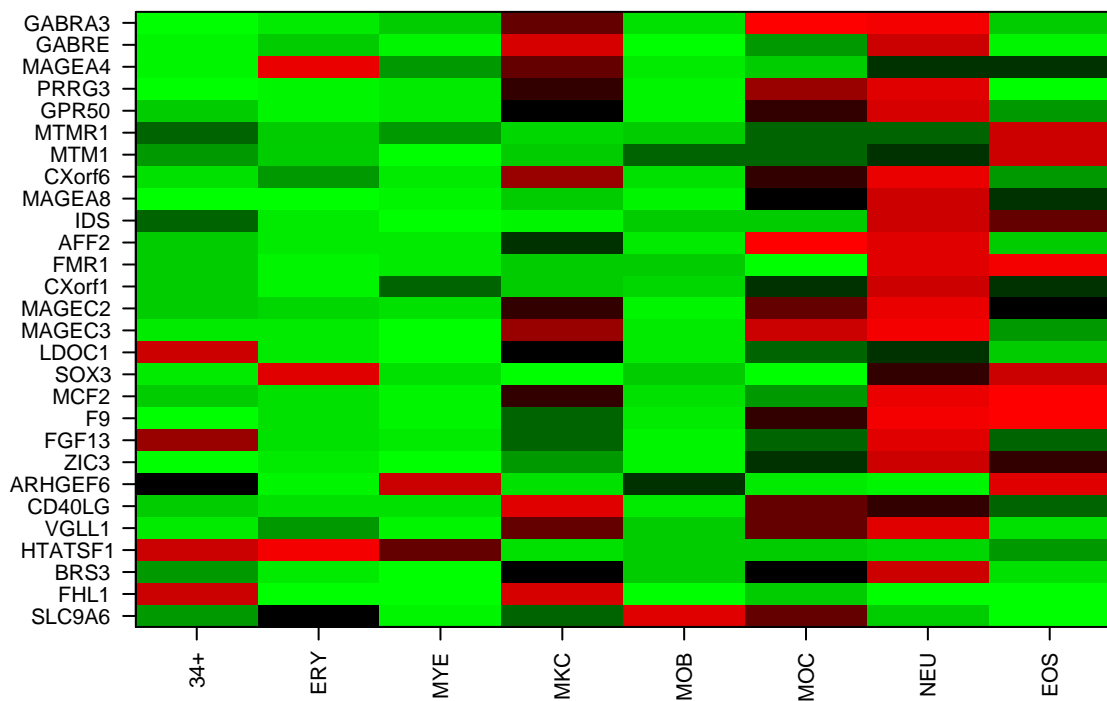

Supplement: gkn948_2.pdf [file gkn948_2.pdf]
