# Supplementary material for: Motif discovery in promoters of genes co-localized and co-expressed during myeloid cells differentiation
Source: PubMed Central journal article supplement — Nucleic Acids Res. 2008 Dec 5;37(2):533–49. doi: 10.1093/nar/gkn948 (PMC2632922; doi:10.1093/nar/gkn948), 2008-12-05

# Panel A

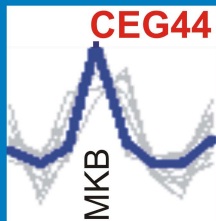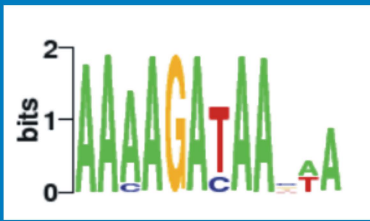

AAAAGATA----  
 -AAAGATAA--  
 --AAGACAAC--  
 -AAAGACAA--  
 -ACAGATAA--  
 ---AGATAATA-  
 ----GATAAGTA

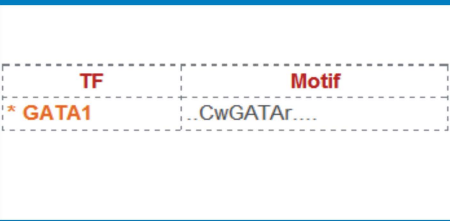

ARACHIDONIC ACID MET.:  
 PROSTAGLANDIN AND  
 LEUKOTRIENE MET.

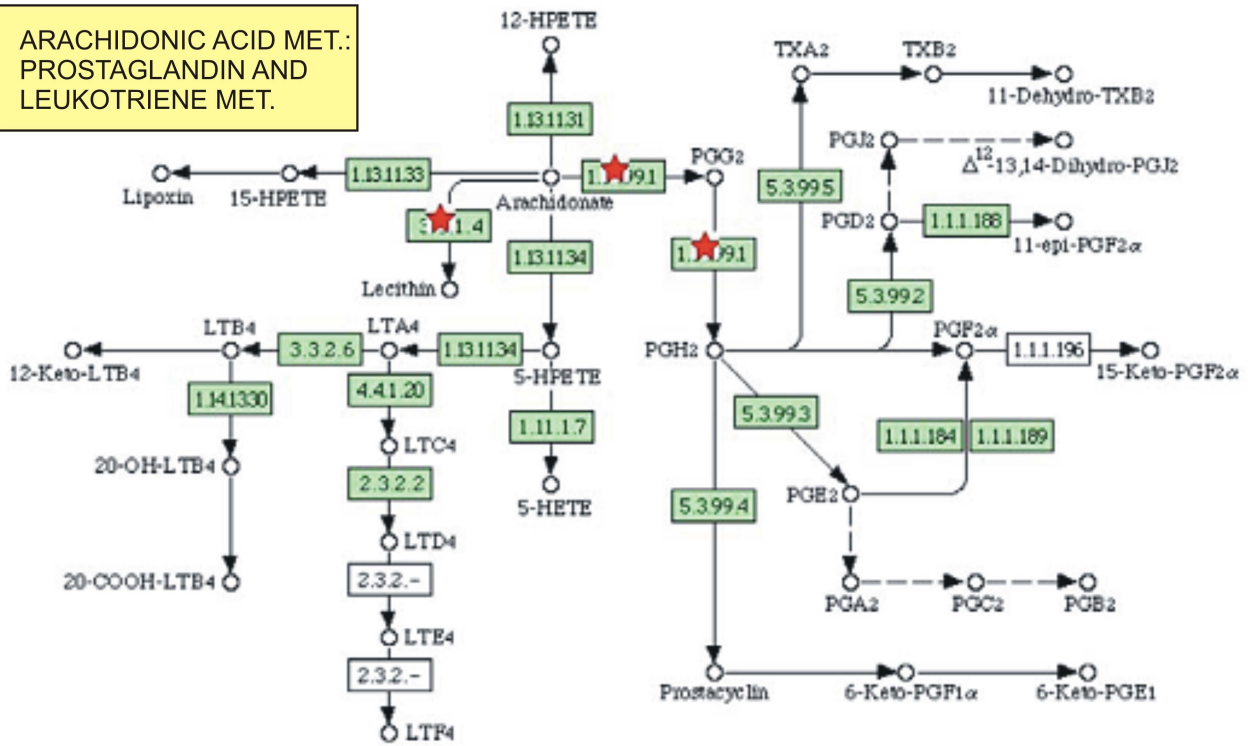

# Panel B

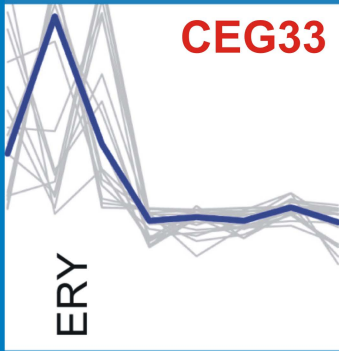

|                     |  |                                     |                 |                        |
|---------------------|--|-------------------------------------|-----------------|------------------------|
| bits<br>2<br>1<br>0 |  | ACCTGTTCT<br>ACTTGTTCT<br>AACTGTTCT | <b>TF</b>       | <b>Motif</b>           |
|                     |  |                                     | * LMO2          | ...s..CAGGTGs..        |
| bits<br>2<br>1<br>0 |  | AAGATA                              | <b>TF</b>       | <b>Motif</b>           |
|                     |  |                                     | Broad-complex_1 | ...tmaWWraCAArw.       |
|                     |  |                                     | NR3C1           | ...srGaaSAkwmygtyC.rkc |
|                     |  |                                     | En1             | ...aagtkrvng..cCtgc    |
|                     |  |                                     | Evi1            | ...raGAYAAGATAA.m      |
|                     |  |                                     | * GATA1         | ...CwGATAr....         |

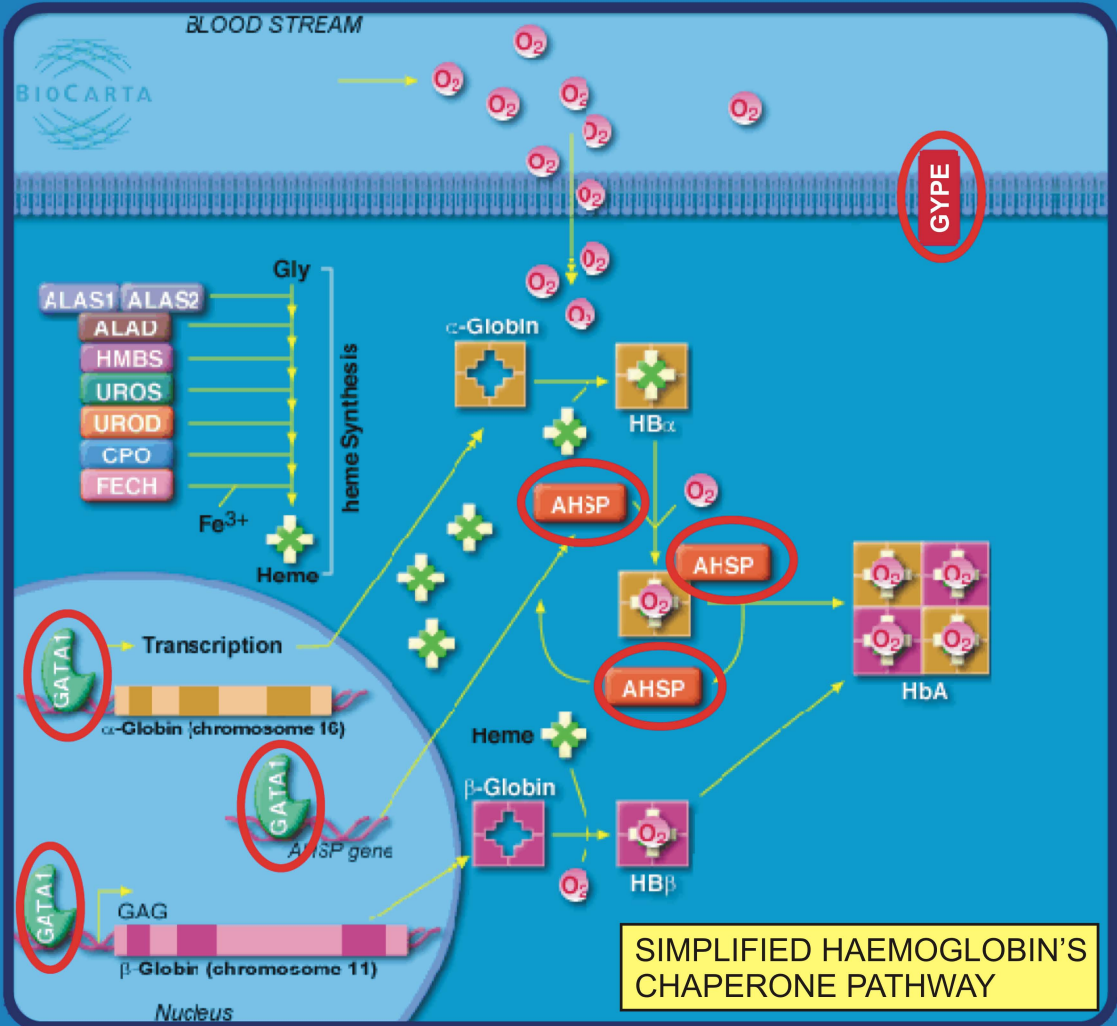

Supplement: gkn948_4.pdf [file gkn948_4.pdf]
