# Supplementary figures and images for: Motif discovery in promoters of genes co-localized and co-expressed during myeloid cells differentiation
Source: PubMed Central journal article supplement — Nucleic Acids Res. 2008 Dec 5;37(2):533–49. doi: 10.1093/nar/gkn948 (PMC2632922; doi:10.1093/nar/gkn948), 2008-12-05

# Number of motifs

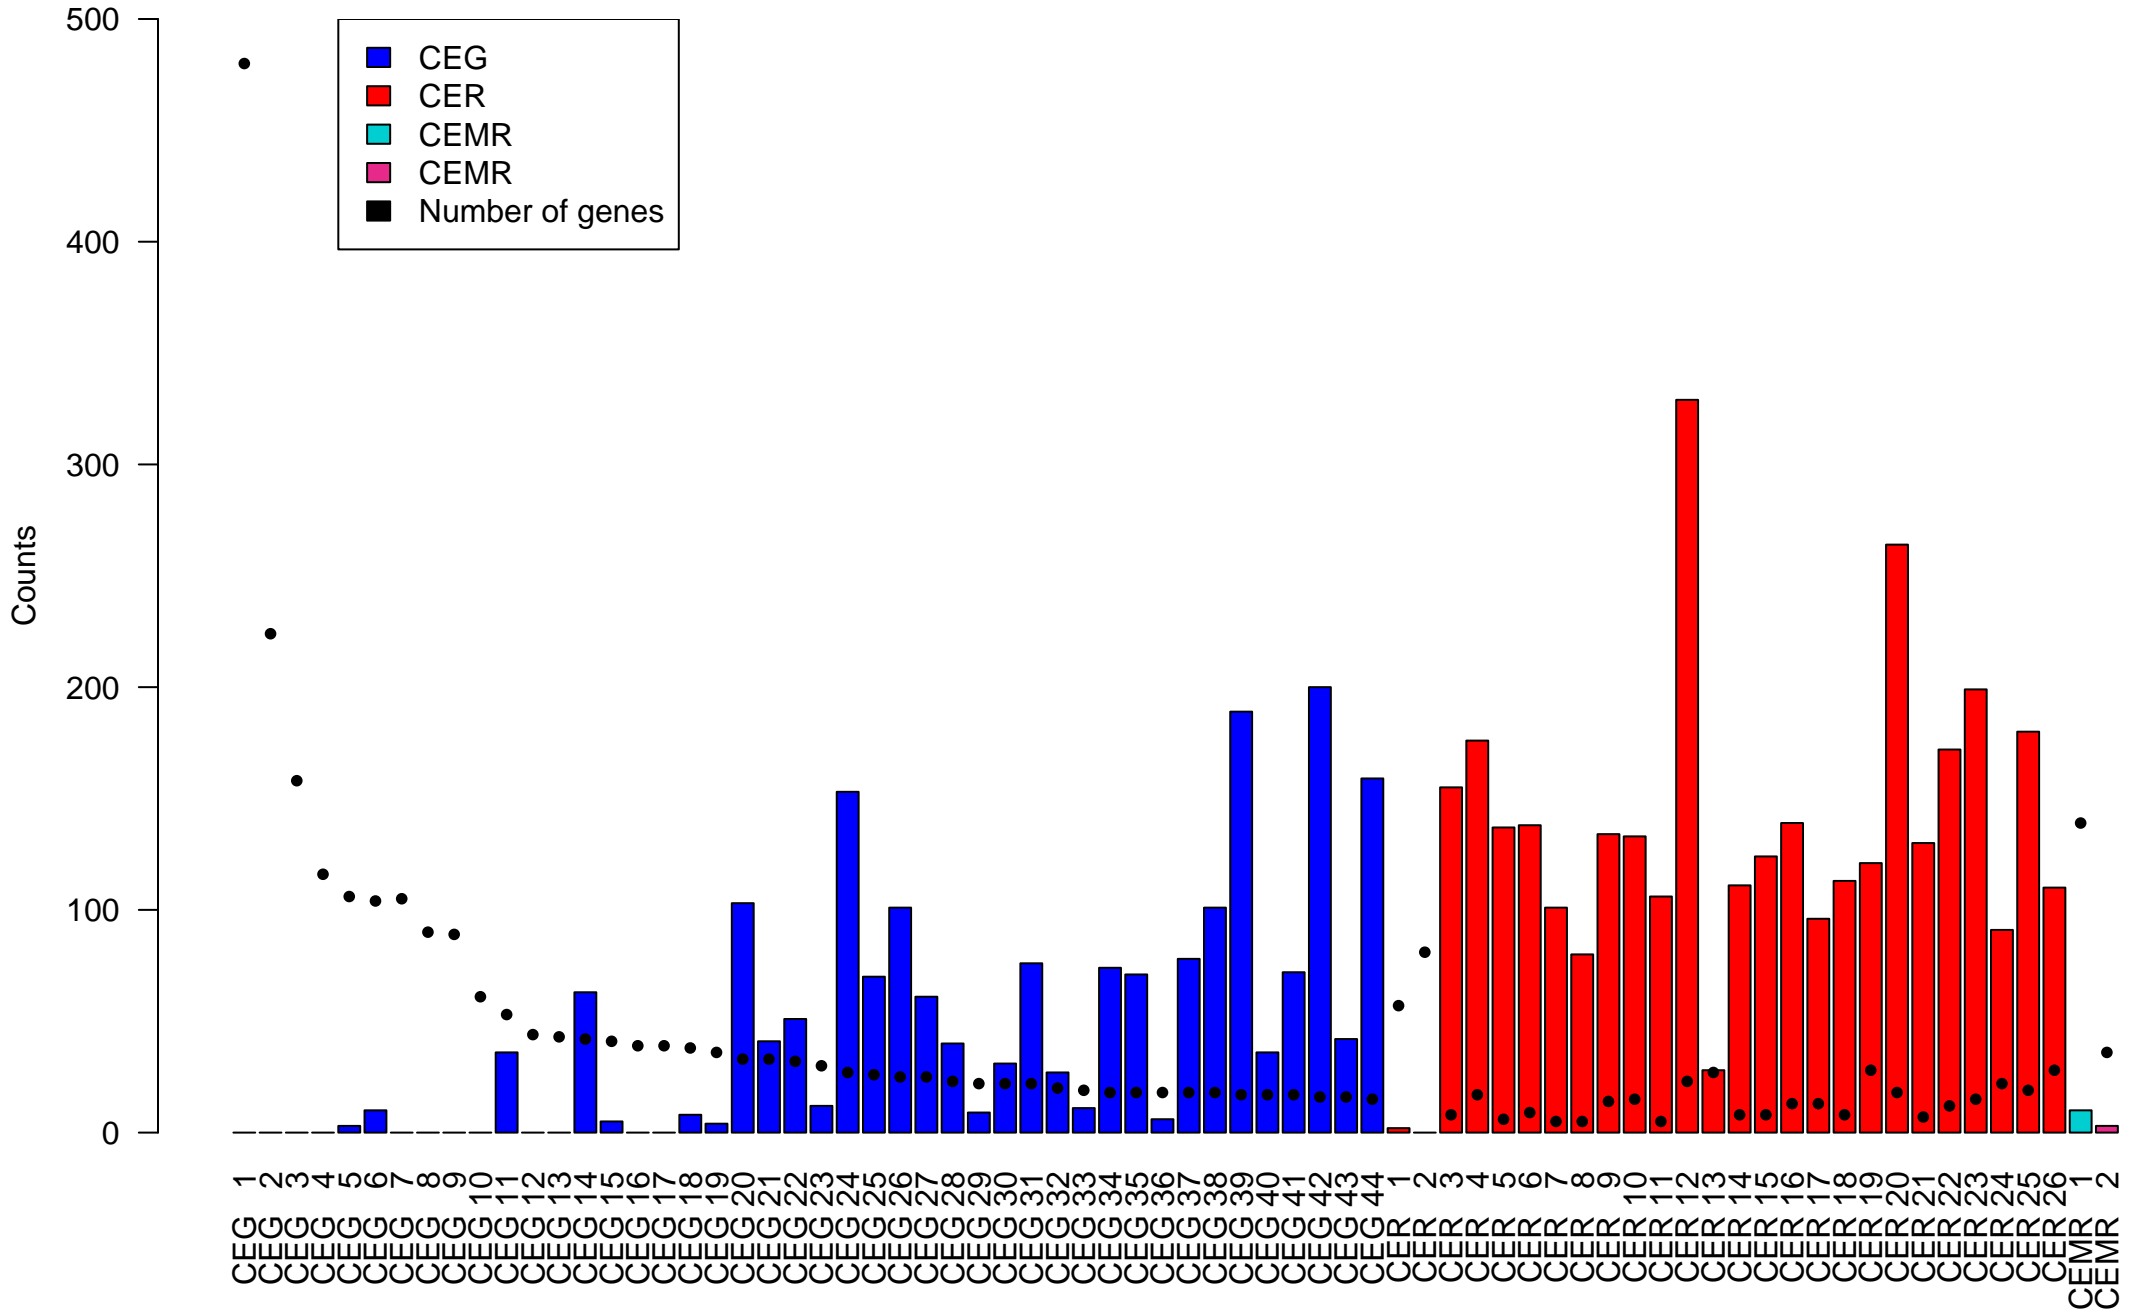

Supplement: gkn948_3.pdf [file gkn948_3.pdf]
